# Supplementary material for: Systematic analysis of JmjC gene family and stress­-response expression of KDM5 subfamily genes in Brassica napus
Source: PeerJ. 2021 Mar 31;9:e11137. doi: 10.7717/peerj.11137 (PMC8019318; doi:10.7717/peerj.11137)
Supplement: Supplemental Information 1 [file peerj-09-11137-s001.xlsx]

## Sheet: Sheet1
Subfamily	Name	Accession ID	Locus	start	end	Strand	Size(aa)	JmjC domain protein sequence
Ⅰ	AtJMJ11	AT5G04240						KLSNSSWNLQMIARSPGSVTRFMPDDIPGVTSPMVYIGMLFSWFAWHVEDHELHSMNYLH TGSPKTWYAVPCDYALDFEEVIRKNSYGRNIDQLAALTQLGEKTTLVSPEMIVASGIPCC RLVQNPGEFVVTFPRSYHVGFSHGFNCGEAANFGTPQWLNVAKEAAVRRA
	AtJMJ12	AT3G48430						TVGETAWNMRAMSRAEGSLLKFMKEEIPGVTSPMVYVAMMFSWFAWHVEDHDLHSLNYLH MGAGKTWYGVPKDAALAFEEVVRVHGYGEELNPLVTFSTLGEKTTVMSPEVFVKAGIPCC RLVQNPGEFVVTFPGAYHSGFSHGFNFGEASNIATPEWLRMAKDAAIRRA
	AtJMJ13	AT5G46910						PLGSSKWNLNKVSRLPKSTLRLLETSIPGVTEPMLYIGMLFSMFAWHVEDHYLYSINYQH CGASKTWYGIPGSAALKFEKVVKECVYNDDILSTNGEDGAFDVLLGKTTIFPPKTLLDHN VPVYKAVQKPGEFVVTFPRAYHAGFSHGFNCGEAVNFAMGDWFPFGAIASCRYA
	BrJMJ11	BraA10g032100.3C	A10	19940123	19944392	-	1160	KLSNSSWNLQMIARSPGSVTRFMPDDIPGVTSPMVYIGMLFSWFAWHVEDHELHSMNYLHTGSPKTWYAVPGDYALDFEEVIRKNSYGSNLDQLAALTQLGEKTTLVSPEIIVSSDIPCCRLVQNPGEFVVTFPRSYHVGFSHGFNCGEAANFGTPQWLNVAKEAAVRRA
	BoJMJ11;a	Bol009997	C09	39310816	39315145	-	1085	KLSNSSWNLQMIARSPGSVTRFMPDDIPGVTSPMVYIGMLFSWFAWHVEDHELHSMNYLHTGSPKTWYAVPSDYALDFEEVIRKNSYGRNIDQLAALTQLGEKTTLVSPEMIVSSDIPCCRVPRSLLPGGRSSRLRD
	BnJMJ11;a	GSBRNA2T00072972001	chrCnn_random	9339664	9344492	-	1124	KLSNSSWNLQMIARSPGSVTRFMPDDIPGVTSPMVYIGMLFSWFAWHVEDHELHSMNYLHTGSPKTWYAVPSDYALDFEEVIRKNSYGRNIDQLAALTQLGEKTTLVSPEMIVSSDIPCCRLVQNPGEFVVTFPRSYHVGFSHGFNCGEAANFGTPQWLNVAKEAAVRRA
	BnJMJ11;b	GSBRNA2T00136387001	chrA10	16644395	16649149	-	1116	KLSNSSWNLQMIARSPGSVTRFMPDDIPGVTSPMVYIGMLFSWFAWHVEDHELHSMNYLHTGSPKTWYAVPGDYALDFEEVIRKNSYGSNLDQLAALTQLGEKTTLVSPEIIVSSDIPCCRLVQNPGEFVVTFPRSYHVGFSHGFNCGEAANFGTPQWLNVAKEAAVRRA
	BrJMJ12	BraA06g018530.3C	A06	10446278	10451456	-	1385	TVGETAWNMRAMARAEGSLLKFMKEEIPGVTSPMVYIAMMFSWFAWHVEDHDLHSLNYLHMGAGKTWYGVPKDAAMAFEEVVRVHGYGEELNPLVTFSTLGEKTTVMSPEVFVRAGIPCCRLVQNPGDFVITFPGAYHSGFSHGFNFGEASNIATPQWLRMAKDAAIRRA
	BoJMJ12;a	Bol037436	C08	23843913	23849015	+	1381	TVGETAWNMRAMARAEGSLLKFMKEEIPGVTSPMVYIAMMFSWFAWHVEDHDLHSLNYLHMGAAKTWYGVPKDAAMAFEEVVRVHGYGEELNPLVTFSTLGEKTTVMSPEVFVRAGIPCCRLVQNPGDFVITFPGAYHSGFSHGFNFGEASNIATPQWLRMAKDAAIRRA
	BnJMJ12;a	GSBRNA2T00068139001	chrCnn_random	8640462	8645564	+	1325	TVGETAWNMRAMARAEGSLLKFMKEEIPGVTSPMVYIAMMFSWFAWHVEDHDLHSLNYLHMGAAKTWYGVPKDAAMAFEEVVRVHGYGEELNPLVTFSTLGEKTTVMSPEVFVRAGIPCCRLVQNPGDFVITFPGAYHSGFSHGFNFGEASNIATPQWLRMAKDAAIRRA
	BnJMJ12;b	GSBRNA2T00125332001	chrA06	9325992	9331626	-	1323	TVGETAWNMRAMARAEGSLLKFMKEEIPGVTSPMVYIAMMFSWFAWHVEDHDLHSLNYLHMGAGKTWYGVPKDAAMAFEEVVRVHGYGEELNPLVTFSTLGEKTTVMSPEVFVRAGIPCCRLVQNPGDFVITFPGAYHSGFSHGFNFGEASNIATPQWLRMAKDAAIRRA
	BrJMJ13;a	BraA02g033320.3C	A02	23024111	23027454	+	771	PLGSSNWNLNKVSRLPKSILRLLETSIPGVTEPMLYIGMLFSMFAWHVEDHYLYSINYQHCGASKTWYGVPGSAALKFEKVVRECVYNDDILSTCGEDGAFDVLLGKTTIFPPKILLDHDVPVYKAVQKPGEFVVTFPRAYHAGFSHGFNCGEAVNFAMSDWFPFGAIASCRYA
	BrJMJ13;b	BraA09g022420.3C	A09	14807443	14810648	+	755	PLGSSKWNLNKVSRLPKSTLRLLETSIPGVTEPMLYIGMLFSMFAWHVEDHYLYSINYQHCGASKTWYGVPGSAALNFEKVVRECVYSDEILSTNGEDGAFDVLLGKTTIFPPKILLDHDVPVYKAVQKPGEFVVTFPRAYHAGFSHGFNCGEAVNFAMGDWFPFGAIASCRYA
	BoJMJ13;b	Bol008515	C07	28861605	28864976	+	795	PLGSSKWNLNKVSRLPKSTLRLLETSIPGITEPMLYIGMLFSMFAWHVEDHYLYSINYQHCGASKTWYGIPGSAALKFEKVVREEVYSDDILSADGEDGAFDVLLGKTTIFPPKILLDHGVPVYKAVQNPGEFIVTFPRAYHAGFSHGFNCGEAVNFAMGDWFPFGAIASCRYA
	BoJMJ13;a	Bol018942	C09	8744312	8747612	-	784	PLGSSKWNLNKVSRLPKSTLRLLETSIPGVTEPMLYIGMLFSMFAWHVEDHYLYSINYQHCGASKTWYGVPGSAALNFEKVVRECVYSDEILSTNGEDGAFHVLLGKTTIFPPKILLDHDVPVYKAVQKPGEFVVTFPRAYHAGFSHGFNCGEAVNFAMGDWFPFGAIASCGYA
	BoJMJ13;c	Bol020130	C02	32417411	32420583	+	744	PLGSSNWNLNKVSTLPKSILRLLETSIPGVTEPMLYIGMLFSMFAWHVEDHYLYSINYQHCGASKTWYGVPGSAALKFEKVVRECVYNDDILSTCGEDGAFDVLLGKTTIFPPKILLDHGVPVYKAVQKPGEFVVTFPRAYHAGFSHGFNCGEAVNFAMGDWFPFGAIASCRYA
	BnJMJ13;d	GSBRNA2T00063420001	chrA02	18097345	18101884	+	744	PLGSSNWNLNKVSRLPKSILRLLETSIPGVTEPMLYIGMLFSMFAWHVEDHYLYSINYQHCGASKTWYGVPGSAALKFEKVVRECVYNDDILSTCGEDGAFDVLLGKTTIFPPKILLDHDVPVYKAVQKPGEFVVTFPRAYHAGFSHGFNCGEAVNFAMSDWFPFGAIASCRYA
	BnJMJ13;a	GSBRNA2T00076684001	chrAnn_random	7144691	7148827	-	774	PLGSSKWNLNKVSRLPKSTLRLLETSIPGVTEPMLYIGMLFSMFAWHVEDHYLYSINYQHCGASKTWYGVPGSAALNFEKVVRECVYSDEILSTNGEDGAFDVLLGKTTIFPPKILLDHDVPVYKAVQKPGEFVVTFPRAYHAGFSHGFNCGEAVNFAMGDWFPFGAIASCRYA
	BnJMJ13;e	GSBRNA2T00076952001	chrC02	35425269	35428933	+	744	PLGSSNWNLNKVSTLPKSILRLLETSIPGVTEPMLYIGMLFSMFAWHVEDHYLYSINYQHCGASKTWYGVPGSAALKFEKVVRECVYNDDILSTCGEDGAFDVLLGKTTIFPPKILLDHGVPVYKAVQKPGEFVVTFPRAYHAGFSHGFNCGEAVNFAMGDWFPFGAIASCRYA
	BnJMJ13;b	GSBRNA2T00115632001	chrC09	16920443	16924606	+	783	PLGSSKWNLNKVSRLPKSTLRLLETSIPGVTEPMLYIGMLFSMFAWHVEDHYLYSINYQHCGASKTWYGVPGSAALNFEKVVRECVYSDEILSTNGEDGAFDVLLGKTTIFPPKILLDHDVPVYKAVQKPGEFVVTFPRGYHAGFSHGFNCGEAVNFAMGDWFPFGAIASCRYA
	BnJMJ13;c	GSBRNA2T00128719001	chrC07	26503154	26506525	+	793	PLGSSKWNLNKVSRLPKSTLRLLETSIPGITEPMLYIGMLFSMFAWHVEDHYLYSINYQHCGASKTWYGIPGSAALKFEKVVREEVYSDDILSADGEDGAFDVLLGKTTIFPPKILLDHGVPVYKAVQNPGEFIVTFPRAYHAGFSHGFNCGEAVNFAMGDWFPFGAIASCRYA
Ⅱ	AtJMJ14	AT4G20400						QYSQCGWNLNNLSRLPGSVLAFESCDISGVIVPWLYVGMCFSTFCWHVEDHHLYSMNYLH TGDPKVWYGIPGNHAESFENVMKKRLPDLFEEQPDLLHQLVTQLSPRILKEEGVPVYRAV QRSGEFILTFPKAYHSGFNCGFNCAEAVNVAPVDWLVHGQNAVEGYS
	AtJMJ15	AT2G34880						KYISSGWNLNNLARLQGSLLSFEDCEISGVQVPWLYVGMCFSTFCWHVEDNHLYSLNYHH FGEPKVWYGVPGSHATGLEKAMRKHLPDLFDEQPDLLHELVTQFSPTILKNEGVPVYRAV QNAGEYVLTFPRAYHSGFNCGFNCAEAVNVAPVDWLAHGQNAVEIYS
	AtJMJ16	AT1G08620						KYAKSGWNLNNFPRLPGSLLKYEGSDISGVLVPWLYIGMCFSSFCWHVEDHHLYSLNYMH WGAPKLWYGVGGKDAVKLEEAMRKHLPDLFEEQPDLLHKLVTQLSPSKLKTAGVPVHRCV QHAGEFVLTFPRAYHAGFNSGFNCAEAVNVAPVDWLPHGQIAIELYC
	AtJMJ18	AT1G30810						QYTLSGWNLNNLPRLPGSVLSFEDCDISGVLVPWLYVGMCFSSFCWHVEDHHLYSLNYHH FGEPKVWYGVPGSNATALEKAMRKHLPDLFEDSLIYYMAWLLSFLLQYXKDEGVQAYRVV QNSGEYVLTFPRAYHAGFNCGFNCAEAVNVAPVDWLAHGQNAVELYS
	AtJMJ19	At2g38950						SSGWNLNSTAKLPGSLLSLEDCESVCVPRLSVGMCLSSQFWKSEKERLYSLCYLHVGAPR VWYSVAGCHRSKFKAAMKSFILEMSGEQPKKSHNPVMMMSPYQLSVEGIPVTRCVQHPGQ YVIIFPGSYYSAFDCGFNCLEKANFAPLDWLPHGDIAVQVNQ
	BrJMJ14;b	BraA01g011450.3C	A01	5986509	5991065	+	935	QYSTSGWNLNNLSRLPGSVLSFERCDISGVIVPWLYVGMCFSTFCWHVEDHHLYSLNYLHTGDPKVWYGIPGSHAASFENAMKKLLPDLFEEQPDLLHQLVTQLSPSILKEQGIPVYRAVQRSGEFILTFPKAYHSGFNCGFNCAEAVNVAPVDWLVHGQDAVEGYS
	BrJMJ14;a	BraA01g012140.3C	A01	6300636	6304820	-	962	QYSTSGWNLNNLSRLPGSVLSFERCDISGVIVPWLYVGMCFSTFCWHVEDHHLYSLNYLHTGDPKVWYGIPGSHAASFENAMKKLLPDLFEEQPDLLHQLVTQLSPSILKEQGIPVYRAVQRSGEFILTFPKAYHSGFNCGFNCAEAVNVAPVDWLVHGQDAVEGYS
	BoJMJ14;a	Bol028347	C01	7391297	7395951	+	966	QYSTSGWNLNNLSRLPGSVLSFEKCDISGVIVPWLYVGMCFSTFCWHVEDHHLYSLNYLHTGDPKVWYGIPGSHAASFENAMKKLLPDLFEEQPDLLHQLVTQLSPSILKEQGIPVYRAVQRSGEFILTFPKAYHSGFNCGFNCAEAVNVAPVDWLVHGQDAVEGYS
	BnJMJ14;a	GSBRNA2T00131512001	chrA01	5290593	5295855	+	963	QYSTSGWNLNNLSRLPGSVLSFERCDISGVIVPWLYVGMCFSTFCWHVEDHHLYSLNYLHTGDPKVWYGIPGSHAASFENAMKKLLPDLFEEQPDLLHQLVTQLSPSILKEQGIPVYRAVQRSGEFILTFPKAYHSGFNCGFNCAEAVNVAPVDWLVHGQDAVEGYS
	BnJMJ14;b	GSBRNA2T00138080001	chrC01	7635704	7640890	+	964	QYSTSGWNLNNLSRLPGSVLSFEKCDISGVIVPWLYVGMCFSTFCWHVEDHHLYSLNYLHTGDPKVWYGIPGSHAASFENAMKKLLPDLFEEQPDLLHQLVTQLSPSILKEQGIPVYRAVQRSGEFILTFPKAYHSGFNCGFNCAEAVNVAPVDWLVHGQDAVEGYS
	BrJMJ15;a	BraA04g024870.3C	A04	17971160	17974634	-	775	TSGWDLNNLRRLSGSLLSFERGDISGVLVPWVYHVEDHHLYSINYNHFGEPKVWYGVPGTHATSLEKAMRKHLPELFEETPDLLHGLVTQFSPSILKDEGVPVYRAVQRAGEYVLTFPRAYHAGFNSGFNCAEAVNVATVDWLSHGQNAVELLS
	BrJMJ15;b	BraA04g025520.3C	A04	18267639	18270216	+	599	RGETSGWNLNNLPRLSGSLLSFERGDISGVLVPWVYVGMCFSTFCWHVEDHHLYSINYNHFGEPKVWYGVPGTHATALEKAMRKHLPDLFEETPDLLHGLVTQFSPSILKEEGVPVYRAVQRAGEYVLTFPRAYHAGFNSGFNCAEAVNVATVDWLSHGQNAVELLS
	BoJMJ15;a	Bol037763	C04	36449415	36451873	+	563	RGETSGWNLNNLPRLSGSLLSFERGDISGVLVPWVYVGMCFSTFCWHVEDHHLYSINYNHFGEPKVWYGVPGTHATALEKAMRKHLPDLFEETPDLLHGLVTQFSPSILKDEGVPVYRAVQRAGEYVLTFPRAYHAGFNSGFNCAEAVNVATVDWLSHGQNAVELLS
	BoJMJ15;b	Bol037836	C04	35927635	35931199	-	707	RGETSGWNLNNLPRLSGSLLSFERGDISGVLVPWVYVGMCFSTFCWHVEDHHLYSINYNHFGEPKVWYGVPGTHATALEKAMRKHLPDLFEETPDLLHGLVTQFSPSILKDEGVPVYRAVQRAGEYVLTFPRAYHAGFNSGFNCAEAVNVATVDWLSHGQNAVELLS
	BnJMJ15;a	GSBRNA2T00051424001	chrC04	44735959	44738539	+	563	RGETSGWNLNNLPRLSGSLLSFERGDISGVLVPWVYVGMCFSTFCWHVEDHHLYSINYNHFGEPKVWYGVPGTHATALEKAMRKHLPDLFEETPDLLHGLVTQFSPSILKDEGVPVFRAVQRAGEYVLTFPRAYHAGFNSGFNCAEAVNVATVDWLSHGQNAVELLS
	BnJMJ15;c	GSBRNA2T00069638001	chrA04	15991452	15994150	+	599	RGDTSGWNLNNLPRLSGSLLSFERGDISGVLVPWVYVGMCFSTFCWHVEDHHLYSINYNHFGEPKVWYGVPGTHATSLEKAMRKHLPDLFEETPDLLHGLVTQFSPSILKDEGVPVYRAVQRAGEYVLTFPRAYHAGFNSGFNCAEAVNVATVDWLSHGQNAVELLS
	BnJMJ15;b	GSBRNA2T00076994001	chrA04	15742190	15745764	-	760	TSGWDLNNLRRLSGSLLSFERGDISGVLVPWVYVGMCFSTFCWHVEDHHLYSINYNHFGEPKVWYGVPGTHATSLEKAMRKHLPDLFEETPDLLHGLVTQFSPSILKDEGVPVYRAVQRAGEYVLTFPRAYHAGFNSGFNCAEAVNVATVDWLSHGQNAVELLS
	BnJMJ16;c	GSBRNA2T00100566001	chrC05	3072836	3078277	+	1132	KYAKSGWNLNNFSRLPGSLLKHEGSDISGVLIPWLYVGMCFSSFCWHVEDHHLYSLNYMHWGAPKLWYGVAGRDAVKLEDAMRKHLPDLFEEQPDLLHKLVTQLSPSKLKTAGVPVHRSVQHAGEFVLTFPRAYHAGFNCGFNCAEAVNVAPVDWLPHGQIAIELYC
	BnJMJ16;d	GSBRNA2T00156225001	chrA06	2872681	2877946	+	1086	KYAKSGWNLNNFSRLPGSLLKHEGSDISGVLVPWLYIGMCFSSFCWHVEDHHLYSLNYMHWGAPKLWYGVSGKDAVKLEEAMRKHLPDLFEEQPDLLHKLVTQLSPSKLKTAGVPVHRCVQHAGEFVLTFPRAYHAGFNCGFNCAEAVNVAPVDWLPHGQIAIELYC
	BnJMJ16;e	GSBRNA2T00104704001	chrC08	18733985	18736228	+	533	KYAKSGWNLNNFSRLPGSLLKHEGSDISGVLVPWLYIGMCFSSFCWHVEDHHLYSMNYMHWGAPKLWYGVAGKDAVKLEEAMRKHLPDLFEEQPDLLHKLVTQLSPSKLKTAGVPVHRCVQHAGEFVLTFPRAYHAGFNCGFNCAEAVNVAPVDWLPHGQIAIELYC
	BrJMJ16;a	BraA06g005740.3C	A06	3354522	3370063	+	2591	KYAKSGWNLNNFSRLPGSLLKHEGSDISGVLVPWLYIGMCFSSFCWHVEDHHLYSLNYMHWGAPKLWYGVSGKDAVKLEEAMRKHLPDLFEEQPDLLHKLVTQLSPSKLKTAGVPVHRCVQHAGEFVLTFPRAYHAGFNCGFNCAEAVNVAPVDWLPHGQIAIELYC
	BrJMJ16;b	BraA08g033080.3C	A08	21837705	21842044	-	1145	KYAKSGWNLNNFSRLPGSLLKHEGSDISGVLVPWLYIGMCFSSFCWHVEDHHLYSMNYMHWGAPKLWYGVAGKDAVKLEEAMRKHLPDLFEEQPDLLHKLVTQLSPSKLKTAGVPVHRCVQHAGEFVLTFPRAYHAGFNCGFNCAEAVNVAPVDWLPHGQNAIELYC
	BnJMJ16;a	GSBRNA2T00047223001	chrA08	18063295	18068247	-	1136	KYAKSGWNLNNFSRLPGSLLKHEGSDISGVLVPWLYIGMCFSSFCWHVEDHHLYSMNYMHWGAPKLWYGVAGKDAVKLEEAMRKHLPDLFEEQPDLLHKLVTQLSPSKLKTAGVPVHRCVQHAGEFVLTFPRAYHAGFNCGFNCAEAVNVAPVDWLPHGQIAIELYC
	BnJMJ16;b	GSBRNA2T00059761001	chrAnn_random	27307612	27314056	+	768	MNTRVEDHHLYSMNYMHWGAPKLWYGVAGKDAVKLEEAMRKHLPDLFEEQPDLLHKLVTQLSPSKLKTAGVPVHRCVQHAGEFVLTFPRAYHAGFNYGFNCAEAVNVAIIDWLPHGQIAIELYC
	BnJMJ18;c	GSBRNA2T00061744001	chrC08	14274485	14278286	+	801	QYAVSGWNLNNLPRLPGSVLSFEDCDISGVLVPWLYVGMCFSSFCWHVEDHHLYSLNYHHFGEPKVWYGVPGSEATSLEKAMRKHLPDLFEEQPDLLHSLVTQFSPSILKDEGVQVYRVVQNPGEYVLTFPRAYHAGFNCGFNCAEAVNVAPVDWLAHGENAVELYS
	BnJMJ18;d	GSBRNA2T00086832001	chrA08	5233312	5236875	+	807	QYAVSGWNLNNLPRLPGSVLSFEDCDISGVLVPWLYVGMCFSSFCWHVEDHHLYSLNYHHFGEPKVWYGVPGSNATSLEKAMRKHLPDLFEEQPDLLHSLVTQFNPSILKDEGVQVYRVVQNPGEYVLTFPRGYHAGFNCGFNCAEAVNVAPVDWLAHGQNAVELYS
	BnJMJ18;a	GSBRNA2T00113804001	chrA09	18797446	18801930	+	845	QYVVSGWNLNNLPRLPGSVLSFEDCDISGVLVPWLYVGMCFSSFCWHVEDHHLYSLNYHHFGEPKVWYGVPGSNATALEKTMRKHLPDLFEEQPDLLHGLVTQFSPSILKDEGVQVYRVVQNAGEYVLTFPRAYHAGFNCGFNCAEAVNVAPVDWLAHGQNAVELYS
	BrJMJ18;a	BraA08g010460.3C	A08	9167705	9171013	+	793	QYAVSGWNLNNLPRLPGSVLSFEDCDISGVLVPWLYVGMCFSSFCWHVEDHHLYSLNYHHFGEPKVWYGVPGSNATSLEKAMRKHLPDLFEEQPDLLHSLVTQFNPSILKDEGVQVYRVVQNPGEYVLTFPRGYHAGFNCGFNCAEAVNVAPVDWLAHGQNAVELYS
	BrJMJ18;b	BraA09g034190.3C	A09	26825171	26828859	+	826	QYVVSGWNLNNLPRLPGSVLSFEDCDISGVLVPWLYVGMCFSSFCWHVEDHHLYSLNYHHFGEPKVWYGVPGSNATALEKTMRKHLPDLFEEQPDLLHGLVTQFSPSILKDEGVQVYRVVQNAGEYVLTFPRAYHAGFNCGFNCAEAVNVAPVDWLAHGQNAVELYS
	BnJMJ18;b	GSBRNA2T00031136001	chrC05	17822445	17826395	-	832	QYVVSGWNLNNLPRLPGSVLSFEDCDISGVLVPWLYVGMCFSSFCWHVEDHHLYSLNYHHFGEPKVWYGVPGSNATALEKAMRKYLPDLFEEQPDLLHGLVTQFSPSILKDEGVQVYRVVQNAGEYVLTFPRAYHAGFNCGFNCAEAVNVAPVDWLAHGQNAVELYS
	BnJMJ19;c	GSBRNA2T00036376001	chrC03_random	589899	594901	-	704	KYKTSGWNLNNTAKLPGSLLTFDDCESVCVPRLSVGMCLSSQLWKSEKERLYSLCYLHTGAPRVWYSVAGCHRYKFMESFVPKVSGEESKKSYDSVMAMSPYALHMEGIPVTRCVQNRGQYVILFPGTYYSAVDCGFNCLEIANFATLDWLPHKEVDALQN
	BnJMJ19;a	GSBRNA2T00116865001	chrA05	3302275	3306910	-	758	KYKTSGWNLNNTAKLPGSLLSYEDCESVGVPRLSVGMFLSSQLWKSEKDRLYSLCYLHMGAPRVWYSVAGCHRSKLMNLFPEMSGEQQSKMSREPVMIMSPYALNMEGIPVTRCVQNPGQYVILFPGSCYSAVNCGFNCLEKANFAPIDWLPHGDVAVHQNQ
	BnJMJ19;e	GSBRNA2T00124799001	chrA03	8556127	8559385	+	717	KYKTSGWNLNNTAKLPGSLLTFDDCESVCVPRLSVGMCLSSQLWKSEKERLYSLCYLHTGAPRVWYSVAGCHRYKFKAFMESFVPKVSGEQSKRSYDSVMAMSPYALHMEGIPVTRCVQNRGQYVILFPGTYYSAVDCGFNCLEIANFATLDWLPHKEIDALQN
	BnJMJ19;b	GSBRNA2T00152869001	chrC04	4684509	4688618	-	769	KYKTSGWNLNNTAKLPGSLLSYEDCESVGVPRLSVGMFLSSQLWKSEKDRLYSLCYLHMGAPRVWYSVAGCHRSKVMNLFPEMSGELQSKISREPVMVMSPYALNMEGIPVTRCVQNPGQYVILFPGSCYSAVNCGFNCLEKANFAPIDWLPHGDVAVHQNQ
	BoJMJ19;d	Bol041226	C05	3133041	3137517	+	557	KYAKSGWNLNNFSRLPGSLLKHEGSDISGVLVPWLYVGMCFSSFCWVYLEANPSEVFAHLSPTKCWEMVRERVNQEISKQHKAGKLDLPPLQPSGSPDGFEMFGYTSPAIIQAIEALDVNRVCTEYWDSRPYSRPQVQLPANPLPREANTSILLPAGTNSTLKVLLKKANMEELSSLQQVLSESN
	BrJMJ19;a	BraA03g020590.3C	A03	9754932	9758195	+	738	KYKTSGWNLNNTAKLPGSLLTFDDCESVCVPRLSVGMCLSSQLWKSEKERLYSLCYLHTGAPRVWYSVAGCHRYKFKAFMESFVPKVSGEQSKRSYDSVMAMSPYALHMEGIPVTRCVQNRGQYVILFPGTYYSAVDCGFNCLEIANFATLDWLPHKEIDALQN
	BrJMJ19;b	BraA05g006830.3C	A05	3470233	3473082	-	682	KYKTSGWNLNNTAKLPGSLLSYEDCESVGVPRLSVGMFLSSQLWKSEKDRLYSLCYLHVGAPRVWYSVAGCHRSKLMNLFPEMSGELQSKMSREPVMIMSPYALNMEGIPVTRCVQNPGQYVILFPGSCYSAVNCGFNCLEKANFAPIDWLPHGDVAVHQNQ
	BoJMJ19;a	Bol017847	C04	6476441	6479534	+	648	KYKTSGWNLNNTAKLPGSLLSYEDCESVGVPRLSVGMFLSSQLWKSEKDRLYSLCYLHMGAPRVWYSVAGCHRSKVMNLFPEMSGELQSKISREPNQEKKKKSLISYDKILLGAAREAVKHLKEYSLSKKKTADNMRW
	BoJMJ19;b	Bol020397	C03	10569593	10572770	+	650	KYKTSGWNLNNTAKLPGSLLTFDDCESVCVPRLSVGMCLSSQLWKSEKERLYSLCYLHTGAPRVWYSVAGCHRYKFMESFVPKVSGEESKKSYDSVMAMSPYALHMEGIPVTRCVQNRGQYVILFPGTYYSAVDCGFNCLEIANFATLDWLPHKESRVKKEK
	BoJMJ19;c	Bol021077	C08	16690346	16704158	+	1469	KYAKSGWNLNNFSRLPGSLLKHEGSDISGVLVPWLYIGMCFSSFCWERECCICFFDLHLSAACCRCSPEKYSCLTHVKQLCSCPWVAKCYLFRYDMDELNVLLEAVEGKLSSVYRWARQDLGLALSEHLSGSKMETGEEEPQAAALLGKDFQLKVTSREDLSRGLEKTLLLKVKEEQLTPSHCMKPVKEEEGISMTAAKSTSGKKSSQSVPDDVILLSDDEHDIPRKQVSEKRDAVSSGKHLKIQERPTHVLALEAPSKTPVPVLEKQANSLPDRQNTMSLPTNDQRAMGEDAPSSVADGLALVTSTQDGVKSTICKSKISGGLAIVDVVDGIRSNSGTPSCSQNNSPDRIIRQKGPRIAKVVRRINCNVEPLNYGSVLSGKSWCNRRAIFPKGFRSRV…
III	AtJMJ17
	BrJMJ17	BraA09g013190.3C	A09	7751201	7758840	-	1460	EYCRSPWNLNNMPKLKGSMLQAIRHNINGVTVPWLYLGMLFSSFCWHFEDHCFYSVNYHHWGEAKCWYGVPGSAASAFEKVMRKTLPDLFDAQPDLLFQLVTMLSPTILQENKVPVYTVLQEPGNFVITFPKSFHAGFNFGLNCAEAVNFATADWLPYGGSGAELYR
	BnJMJ17;b	GSBRNA2T00032740001	chrC09	7882443	7890617	-	1263	EYCRSPWNLNNMPKLKGSMLQAIRHNINGVTVPWLYLGMLFSSFCWHFEDHCFYSVNYHHWGEAKCWYGVPGSAASAFEKVMRKTLPDLFDAQPDLLFQLVTMLSPTVLQENKVPVYTVLQEPGNFVITFPKSFHAGFNFGLNCAEAVNFATADWLPYGGSGAELYR
	BnJMJ17;a	GSBRNA2T00056402001	chrA09	5653122	5661147	-	1463	EYCRSPWNLNNMPKLKGSMLQAIRHNINGVTVPWLYLGMLFSSFCWHFEDHCFYSVNYHHWGEAKCWYGVPGSAASAFEKVMRKTLPDLFDAQPDLLFQLVTMLSPTVLQENKVPVYTVLQEPGNFVITFPKSFHAGFNFGLNCAEAVNFATADWLPYGGSGAELYR
	BnJMJ17;c	GSBRNA2T00056403001	chrA09	5661206	5665504	-	478	EYCRSPWNLNNMPKLKGSMLQAIRHNINGVTVPWLYLGMLFSSFCWHFEDHCFYSVNYHHWGEAKCWYGVPGSAASAFEKVMRKTLPDLFDAQPDLLFQLVTMLSPTVLQENKVPVYTVLQEPGNFVITFPKSFHAGFNFGLNCAEAVNFATADWLPYGGSGAELYR
IV	AtJMJ20	AT1G63490						EYCGSPWNLNNMPKLKGSMLQAIRHNINGVTVPWLYLGMLFSSFCWHFEDHCFYSVNYLH WGEAKCWYGIPGSAASAFEKVMRKTLPDLFDAQPDLLFQLVTMLSPTVLQENKVPVYTVL QEPGNFVITFPKSFHAGFNFGLNCAEAVNFATADWLPYGGSGAELYR
	BrJMJ20	BraA09g007640.3C	A09	4422149	4424782	-	448	DWLNLYLDHYQMHEDRENFQKYDQISCSDYRFVYMGGKGSWTPLHADVFRSYSWSANVCGRKRWLFLPPSQSHLVYDRQGYMKNCVYNIFEEVNETKFPGFKETTWLECIQESGDTIFVPSGWHHQVYNLWDLLWKDYKDTEESIED
	BnJMJ20;b	GSBRNA2T00088919001	chrCnn_random	14725784	14728264	-	468	LYLKDWHFVKEYPDYTAYQTPPLFSDDWLNVYLDNYQMHEDRDSFQKYDQISCSDYRFVYMGGKGSWTPLHADVFRSYSWSANVCGKKRWLFLPPPQSHLVYDRYMKNCVYDIFEEVNETKFPGFKKTTWLECIQEPGEIIFVPSGWHHQVYNLEDTISINHNWLNAYNLSWVWDLLWKDY
V	AtJMJ21	At1g78280						EAAPELLKDYSVPHLFQEDWFEILDKESRPPYRWLIVGPERSGASWHVDPALTSAWNTLL CGRKRWALYPPGKVPLGVTVHVNEDEGDVSIDTPSSLQWWLDYYPLLADEDKPIECTLLP GETIYVPSGWWHCILNLEPTVAVTQNFVNKENFGFVCLD
	AtJMJ22	At5g06550						LYLFDPKFAEKVPVLDSEYDVPVYFREDLFGVLGNERPDYRWIIIGPAGSGSSFHIDPNS TSAWNAVITGSKKWVLFPPDVVPPGVHPSPDGAEVACPVSIIEWFMNFYDDTKDWEKKPI ECICKAGEVMFVPNGWWHLVINLEESIAITQNYASRSNLLNVLEFLKKPN
	BnJMJ21;b	GSBRNA2T00146438001	chrA07	23293787	23298555	+	941	EAAPELLKDYSVPYLFQEDWFEILDKENRPPYRWLIVGPERSGASWHVDPALTSAWNTLLCGRKRWALYPPGKVPLGVTVHVNEDDGDVSIDTPSSLQWWLDYYPLLADEDKPIECTLLAGETIYVPSGWWHCILNLEPTVAVTQNFVNKENFGFVCLD
	BnJMJ21;c	GSBRNA2T00147976001	chrC06	36236425	36241254	+	941	EAAPELLKDYSVPYLFQEDWFEILDKENRPPYRWLIVGPERSGASWHVDPALTSAWNTLLCGRKRWALYPPGKVPLGVTVHVNEDDGDVSIDTPSSLQWWLDYYPLLADEDKPIECTLLAGETIYVPSGWWHCILNLEPTVAVTQNFVNKENFGFVCLD
	BrJMJ21	BraA07g041420.3C	A07	27970511	27975281	+	941	EAAPELLKDYSVPYLFQEDWFEILDKENRPPYRWLIVGPERSGASWHVDPALTSAWNTLLCGRKRWALYPPGKVPLGVTVHVNEDDGDVSIDTPSSLQWWLDYYPLLADEDKPIECTLLAGETIYVPSGWWHCILNLEPTVAVTQNFVNKENFGFVCLD
	BoJMJ21;a	Bol018967	C02	20668190	20669895	+	346	IFLKGFNISCKMILDKENRPRYRWLIVGPERSGASWHVDPALTSAWNTLLFGRKRWALYPPGKVPLGVTVQVNEDDGDVSIDTPSSLQFTIHAQWWLDYYPLLADEDKPIACTLLPGETIYVPCGWWHCILNLEPTVAITQNFVNKENFGFVCLD
	BoJMJ21;b	Bol027492	C06	772507	776891	-	900	EAAPELLKDYSVPYLFQEDWFEILDKENRPPYRWLIVGPERSGASWHVDPALTSAWNTLLCGRKRWALYPPGKVPLGVTVHVNEDDGDVSINTPSSLQWWLDYYPLLADEDKPIECTLLAGETIYVPSGWWHCILNLEPTVAVTQNFVNKENFGFVCLD
	BnJMJ21;a	GSBRNA2T00084360001	chrC02	22282764	22290337	+	514	VFDDRVNLYKALYKAFFTSVVRVAGVKIILKGFNISCKMILDKENRPRYRWLIVGPERSGASWHVDPALTSAWNTLLFGRKRWALPPGKVPLGVAVQVNEDDGNVSIDTPSSLQFTIHAQWWLDYYPLLADEDKPIACTLLPGETIYVPSGWWHCILNLEPTVAITQNFVNKENFGFVCLD
	BnJMJ22;b	GSBRNA2T00107046001	chrC09	47589497	47591425	+	508	LYLFDPKFAEKVPVLDSEYEAPVYFREDLFSVLGNERPDYRWIIIGPSGSGSSFHIDPNSTSAWNAVITGSKKWVLFPPDVVPPGVHPSPDGAEVACPVSIMEWFMNFYGDTRSWNKRPVECVCKAGEVVFVPNGWWHLVINLEESIAITQNYVSRRNLLNVLEFLKKPN
	BnJMJ22;a	GSBRNA2T00136199001	chrA10	15930870	15932763	+	489	LYLFDPKFAEKVPVLDSEYEAPVYFREDLFSVLGNERPDYRWIIIGPSGSGSSFHIDPNSTSAWNAVITGSKKWVLFPPDVVPPGVHPSPDGAEVACPVSIMEWFMNFYGDTRSWKKRPVECVCKAGEVMFVPNGWWHLVINLEESIAITQNYVSRRNLLNVLEFLKKPN
	BrJMJ22	BraA10g029240.3C	A10	18709875	18711662	-	507	LYLFDPKFAEKVPVLDSEYEAPVYFREDLFSVLGNERPDYRWIIIGPSGSGSSFHIDPNSTSAWNAVITGSKKWVLFPPDVVPPGVHPSPDGAEVACPVSIMEWFMNFYGDTRSWKKRPVECVCKAGEVMFVPNGWWHLVINLEESIAITQNYVSRRNLLNVLEFLKKPN
	BoJMJ22;a	Bol043936	C09	38537598	38539395	+	505	LYLFDPKFAEKVPVLDSEYDAPVYFREDLFSVLGNERPDYRWIIIGPSGSGSSFHIDPNSTSAWNAVITGSKKWVLFPPDVVPPGVHPSPDGAEVACPVSIMEWFMNFYGDTRSWKKRPVECVCKAGEVVFVPNGWWHLVINLEESIAITQNYVSRRNLLNVLEFLKKPN
VI	AtJMJ30	At3g20810						TYLAQHPLFDQINELRDDICIPDYCFVGGGELQSLNAWFGPAGTVTPLHHDPHHNILAQV VGKKYIRLYPSFLQDELYPYSETMLCNSSQVDLDNIDETEFPKAMELEFMDCILEEGEML YIPPKWWHYVR
	AtJMJ31	At5g19840						DYRPGQIYLAQFPILNDEKEEKVLLKILRQDIQTPTFLDAKSLSSINFWMNSAEARSSTH YDPHHNLLCVVSGRKKVVLWPPSASPSLYPMPIYGEASNHSSVGLENPNLSDYPRAEHSL KQSQEITLNAGDAVFIPEGWFHQVDSDELTVAVNFWWQSNYMSNMPEHMDSYYLRR
	AtJMJ32	At3g45880						GYLQQQNDCFRTEYSTVALDCDGDIEWATEAFGCSPEAVNLWIGTDDSVTSFHKDHYENL YAVVSGEKHFLLLPPTDVHRLYIEQYPAANYSYHRDTDAFKLEVEEPVRHVPWSSVDPYP SPEKEASERLKFPLFFDGPKPFHCTVKAGEVLYLPSMWFHHVSQTPGDGGYTIAVNYWYD MQFDIKYAYFNFLQ
	BnJMJ30;a	GSBRNA2T00009267001	chrA05	15559975	15562212	-	414	STSVEPTYLAQHPLFDQINELRDDICIPDYCFVGGGDLQSLNAWFGPAGTVTPLHHDPHHNILAQVVGKKYIRLYPSSLEDELYPYSETMLCNSSQVDLDNIDKNEFPKVVELEFMDCILEEGEMLYIPPKWWHYVRSLTMSFSVSFWWSNEAESSDS
	BnJMJ30;b	GSBRNA2T00122347001	chrC05	30856253	30858596	-	414	STSVEPTYLAQHPLFDQINELRDDICIPDYCFVGGGDLQSLNAWFGPAGTVTPLHHDPHHNILAQVVGKKYVRLYPSSLQDELYPYPETMLCNSSQVDLDNIDKNEFPKAVELEFMDCILEEGEMLYIPPKWWHYVRSLTMSFSVSFWWSNEAESSDS
	BrJMJ30	BraA05g026320.3C	A05	19843310	19845263	-	414	STSVEPTYLAQHPLFDQINELRDDICIPDYCFVGGGDLQSLNAWFGPAGTVTPLHHDPHHNILAQVVGKKYIRLYPSSLQDELYPYSETMLCNSSQVDLDNIDKNEFPKVVELEFMDCILEEGEMLYIPPKWWHYVRSLTMSFSVSFWWSNEAESSDS
	BoJMJ30;a	Bol038443	C05	20990127	20992077	-	414	STSVEPTYLAQHPLFDQINELRDDICIPDYCFVGGGDLQSLNAWFGPAGTVTPLHHDPHHNILAQVVGKKYVRLYPSSLQDELYPYPETMLCNSSQVDLDNIDKNEFPKAVELEFMDCILEEGEMLYIPPKWWHYVRSLTMSFSVSFWWSNEAESSDS
	BnJMJ31;a	GSBRNA2T00140795001	chrC03	4699358	4703251	+	553	VQLKILRQDLQTPSLLGGKSLSSINFWMNSAQARSSTHYDPHHNLLCVVSGCKKVVLWPPSASPSLYPMPIYGEASNHSSVGLDNPNLSDYPRAELSLQFSQEVTLNAGDAVFIPEGWFHQVDSDELTIAVNFWWQSNIMSNMPEHMDSYYLRR
	BnJMJ31;b	GSBRNA2T00148959001	chrA03	3451908	3455732	+	540	VQLKILRQDIQTPSLLEGKSLSSINFWMNSAQARSSTHYDPHHNLLCVVSGCKKVVLWPPSASPSLYPMPIYGEASNHSSVGLDNPNLSDYPRAEHSLKQSQEVTLKAGDAVFIPEGWFHQVDSNELTIAVNFWWQSNIMSNMPEHMDSYYLRR
	BrJMJ31	BraA03g009260.3C	A03	3976918	3980536	+	540	ILRQDIQTPTLLGGKSLSSINFWMNSAQARSSTHYDPHHNLLCVVSGCKKVVLWPPSASPSLYPMPIYGEASNHSSVGLDNPNLSDYPRAEHSLKQSQEVTLKAGDAVFIPEGWFHQVDSNELTIAVNFWWQSNIMSNMPEHMDSYYLRR
	BrJMJ32	BraA06g020720.3C	A06	12008604	12010037	+	347	GYLQQQNDCFRTEYSTVASDCDGDIAWATEALGCSPEAVNLWIGTHLSVTSFHKDHYENLYAVVSGEKHFLLLPPTDVHRLYVQPYPAANYSYHRDTETFKLEIEQPLRHVPWCSVDPYPSPEREASERLKYPFYFDGPKPFHCTLKAGEILYLPSMWFHHVSQTPGDGGYTIAVNYWYDMQFDIKYAYFNFLQ
	BoJMJ32;a	Bol041361	C03	35331729	35333270	-	350	GYLQQQNDCFRTEYSTVASDCDGDIAWATEALGCSPEAVNLWIGTDLSVTSFHKDHYENLYAVVSGEKHFLLLPPTDVHRLYVQRYPAANYSYHRDTETFKLEIEQPVRHVPWCSVDPYPSPEREASERLKYPFFFDGPEPFHCTLKAGEILYLPSMWFHHVSQTPGEGGYTIAVNYWYDMQFDIKYAYFNFLQ
	BnJMJ32;a	GSBRNA2T00107296001	chrA06	10501009	10502664	+	350	GYLQQQNDCFRTEYSTVASDCDGDIAWATEALGCSPEAVNLWIGTHLSVTSFHKDHYENLYAVVSGEKHFLLLPPTDVHRLYVQPYPAANYSYHRDTETFKLEIEQPLRHVPWCSVDPYPSPEREASERLKYPFFFDGPKPFHCTLKAGEILYLPSMWFHHVSQTPGDGGYTIAVNYWYDMQFDIKYAYFNFLQ
	BnJMJ32;b	GSBRNA2T00144013001	chrC03	44700837	44702487	+	346	GYLQQQNDCFRTEYSTVASDCDGDIAWATEALGCSPEAVNLWIGTDLSVTSFHKDHYENLYAVVSGEKHFLLLPPTDVHRLYVQRYPAANYSYHRDTETFKLEIEQPVRHVPWCSVDPYPSPEREASERLKYPFFFDGPEPFHCTLKAGEILYLPSMWFHHVSQTPGEGGYTIAVNYWYDMQFDIKYAYFNFLQ
Ⅶ	AtJMJ24	At1g09060						IFYQRPEFIRSFPFLEYIHPRLGLLNVAAKLPHYSLQNDSGPKIYVSCGTYQEISAGDSL TGIHYNMRDMVYLLVHTSEETTFERVRKTKPVPEEPDQKMSENESLLSPEQKLRDGELHD LSLGEASMEKNEPELALTVNPENLTENGDNMESSCTSSCAGGAQWDVFRRQDVPKLSGYL QRTFQKPDNIQTDFVSRPLYEGLFLNEHHKRQLRDEFGVEPWTFEQHRGEAIFIPAGCPF QITNLQSNIQVALDFLCPESVGESARLAEEIR
	AtJMJ25	At3g07610						LPRHAEEFLCSLPLKHYTHPVNGPLNLAVKLPQNCLKPDMGPKTYVASGFAQELGRGDSV TKLHCDMSDAVNILTHISEVPNMQPGIGNLKKKHAEQDLKELYSSVANKEEMMEILENSR QQVQNVETDDGALWDIFRREDIPKLESYIEKHHKEFRHLYCCPVSQVVHPIHDQNFYLTR YHIMKLKEEYGIEPWTFNQKLGDAVLIPVGCPHQVRNLKSCNKVALDFVSPENVSECLRL TKQYR
	AtJMJ26	At1g11950						LPRHCDEFISALPFQEYSDPRSGILNIATKLPEGLLKPDLGPKTYVAYGTSDELGRGDSV TKLHCDMSDAVNILMHTAEVTLSEEQRSAIADLKQKHKQQNEKELQEQNGLEEEEVVSDE IVVYDETSGALWDIFKREDVPKLEEYLRKHCIEFRHTYCSRVTKVYHPIHDQSYFLTVEH KRKLKAEFGIEPWTFVQKLGEAVFIPAGCPHQVRNLKSCTKVAVDFVSPENIDECLRLTD EFR
	AtJMJ27	At4g00990						LPRHNAEFIAALPFFDYTDPKSGILNLATRFPEGSLKPDLGPKTYIAYGFHEELNRGDSV TKLHCDISDAVNVLTHTAKVEIPPVKYQNIKVHQKKYAEAMLQKQQYSGQVKEASELENK SMKEVDESKKDLKDKAANEEQSNNSSRPSGSGEAEKVIISKEDNPTQPAVSTSVESIQEQ KLDAPKETDGNTNERSKAVHGGAVWDIFRREDVPKLIQFLKRHEHEFRHFNNEPLESVIH PIHDQTMFLSDSQKKQLKEEFDIEPWTFEQHLGEAVFIPAGCPHQVRNRQSCIKVALDFV APESVEECLRLTQEFR
	AtJMJ28	At4g21430						FPNHYAEILNILPISHYMDPKRGLLNIAANLPDTVQPPDFGPCLNISYRSGEEYAQPDSV KKLGFETCDMVDILLYVTETPVSTNQICRIRKLMKNIGRVRSKNPAKGRESRFDKGKKRD RLDDYSSSDSESSQHCLGAKCRGSEFEGEERESCNYSCEEESLSNTYGAQWDVFQKQDVS KLLEYIKNHSLELESMDSSKKKVSHPLLEQSYYLDEYHKARLKEEFDVEPWSFDQCVGEA VILPAGCPYQIRKNKSCVNAVLKFLSPEHVSESIKRVKELN
	AtJMJ29	At1g62310						LPRHCDEFISALPFQEYSDPRTGILNIATKLPEGFIKPDLGPKTYIAYGIPDELGRGDSV TKLHCDMSDAVNILTHTAEVTLSQEQISSVKALKQKHKLQNKVDKQSTEDCNEKEEEEEE ELNMPEISSNENEETGSALWDIFRREDVPKLEEYLRKHCKEFRHTYCSPVTKVYHPIHDQ SCYLTLEHKRKLKAEYGIEPWTFVQKLGEAVFIPAGCPHQVRNLKSCTKVAVDFVSPENI HECLRLTEEFR
	BrJMJ27;b	BraA03g029710.3C	A03	14954597	14956991	+	564	LPRHNSEFISALPFSVYTDAKSGIFNLATRLPKGSLKPDLGPKTYIAYGFPEELDGGDSVTKLHCDVSDAVNVLTHTAKVDIPPWQYKLVKKAQLRKQHVGQQTEASASENKSLKEVENEEAALKNCDGLVREESLKNKAGNKEPSNNSSKRSSSQEGDNIFVSKCIQNVTMTNESIADENHNDVCLKTERLSSEETNGNANESSKAVRGGAVWDIFRREDVPKLIEYLKRHKHEFRHFYNEPVKSVIHPIHDQSMFLSESQKKQLKEEFDIEPWTFEQHLGEAVFIPAGCPHQVRNIQSCIKVALGFVAPESVEECLRLTQEFR
	BrJMJ27;a	BraA03g029730.3C	A03	14960413	14967721	+	970	LPRHNAEFISSLPFSDYTDPKSGLLNLATRLPEESLKPDLGPKTYIAYGFPEELDGGDSVTKLHCDMSDAVNVLTHTAKVNIPSWQHKLVKKAKLRKQLSGQETEASECENKSVKEVENEEAALKKCDGLVGEETLKDKAANEDDKMFVSKGKCTKTERDDPVEGSCSSKSGHDPKADAGLINEPIAGENNSEVCLKTERLSPTNQSEDDPTVENGLKMPTALSTAPWDTDGSLPPPMESIKEEKLDSPKETEGNVTQSLDGSTSAETIQEQKHDAPKETNGNANESSEGVHGGAVWDIFRREDVPKLIEYLERHKHEFRHFFNEPVESVTHPIHDQTLFLTESQKKQLKEEFDIEPWTFVQHLGEAVFIPAGCPHQVRNIQSCIKVALDFVAPESLEE…
	BrJMJ28	BraA03g049530.3C	A03	25287060	25290845	-	944	FANHFAEILRILPIPYYMDPKRGILNIVAGLPDVIQAPNLGPCLSISYRSGEEYAKPDYVKKLGFEACDMVDILLHATETVVSTKQICRIRKLMQNIGKVRSKNSEKGKESRVGKGKKQDRINASYAQGDWSDDSSSSDSESSQHRLGSSEFKVEERESCNDSFEEEGSLSNSCGAKWDVFQVQDVSKLLEYIKNHCLELVPMDSTKTQVSHPLLEQSYYLDEYHKARLKEEFGKYHSSFFCLLILPFRYYFNAYSVSSDVEPWSFDQCVGEAVIVPAGCPYQNRKNKSCVNAVLNFLSPEHVAESIKLVDELS
	BrJMJ25	BraA05g038070.3C	A05	26096898	26104045	-	1063	LPRHCEEFLCSLPLKQYTHPVSGPLNLAVKLPDFCLKPDMGPKTYVAYGFAQEMGRGDSVTKLHCDMSDAVNVLTHVSEVTIKEEEKKSTIEKLKRKHAAQDVKELFGSVPNYKEKIEILENTNEEEVKNLEADGGALWDIFRREDVPKLEKYLLSHHKEFRHFFCSPVSKVVHPIHDQSFYLTRYHKMILKEEYGIEPWTFVQKLGDAVLIPVGCPHQVRNLKSCTKVALDFVSPENISECFRLTKEYR
	BrJMJ26	BraA08g031280.3C	A08	21019467	21022860	+	840	LPRHCDEFVSALPFQEYSDPRSGVLNIATKLPEGVLKPDLGPKTYIAYGNADELGRGDSVTKLHCDMSDAVNILMHTAEVTLSKEQLSAIEALKLKHKQQDEKELQDQNDLDRGEIVAVNDENEFHHDETGSALWDIFRREDVPKLEEYLRKHCKEFRHTYCSPVTKVYHPIHDQTLFLTVEHKRKLKAEFGIEPWTFVQKVGEAVFIPAGCPHQVRNLKSCTKVAVDFVSPENIHECLRLTEEFR
	BrJMJ24	BraA08g032870.3C	A08	21731231	21735127	+	902	IFYQRPEFIRRFPFLEYIHPRLGLLNVAAKMPHYSLQNDSGPKVIVSCGTYKETDGGDSSNSIHYSMRDMVYLLVHTPEGTKLESVRETTNHGPGKADEKMGENESLVSPKEKLIDGELHDLSLGTSNTEKNESEMMLSVEPSCTSSCAGGVQWDVFRRQDVPKLAEYLQRTFQKPDDSLKCDFVSRPLFEGLFLNEHHKRQLKDEFGVEPWTFEQHRGEAIFIPAGCPFQFRNLQSNVQVALDFLCPESVGESARLAEEIR
	BrJMJ27;c	BraA09g000040.3C	A09	16233	21952	+	887	LPRHNDEFMSALPFFDYTDPESGIFNLATRLPDGSLKPDLGPKTYIAYGFHEELNRGDSVTKLHCDVSDAVNVLTHTAKVDLTPRQYQKIKLEQKSYAKAQLRKQQKNKSLGEVDKDEIILIENEEDLKNCNGLLGEHSLKDKAAKEESSYSIPGPSSSQKGECINIGRADDPKEGSSSLNSCTVAMESGHDTKVDVGLITQKNVTVKRESVADENHDDVCLKTEISSPSQREADSAVENELNMPTLPSTLPQPVVSTSAESIEEEKLDAPIETNGNANESTKAVHGGAVWDIFRREDVPKLIEYLKRHKHEFRHLYNEPVKSVSHPIHDQSMFLNERQKKQLKEEFDIEPWTFVQHLGEAVFIPAGCPHQVRNIQSCIKVALDFVAPESVEECLRLTE…
	BrJMJ29	BraA09g016000.3C	A09	9722495	9726083	+	936	LPRHCDEFISALPFQEYSDPRTGILNIAAKLPEGLIKPDLGPKTYIAYGIPDELGRGDSVTKLHCDMSDAVNILTHTTEVTLSQEQISAVKDLKQKHKEQNKLEEQGSGDKDIACGREEEGMDMPEIMSYEKQQNHDETGSALWDIFRREDVPKLEEYLRKHCKEFRHTFCCPVTKVNNTHCMTTCLLFRYTDKCFDMFFIQVYHPIHDQSCYLTVEHKRKLKAEFGMLNCSLSGLCIDKLNGLSEIVGIEPWTFVQKLGEAVFIPAGCPHQVRNLKSCTKVAVDFVSPENIHECLRLTEEFR
	BoJMJ25;a	Bol007691	C05	32083094	32090119	-	957	LPRHCEEFLCSLPLKQYTHPVSGPLNLAVKLPEKCLKPDMGPKTYVAYGFSQEMGRGDSVTKLHCDMSDAVNVLTHVSEVTIKEEEKKSTIEKLKRKHAAQDVKELFGSVPNYKEKIEILENTSEEEVKNLEADGGALWDIFRREDVPKLEKYLLSHHKEFRHFFCSPVSKVVHPIHDQSFYLTRYHKMILKEEYGIEPWTFVQKLGDAVLIPVGCPHQVRNLKSCTKVALDFVSPENISECFRLTKEYR
	BoJMJ24;a	Bol022149	C08	17205433	17209338	-	902	IFYQRPEFIRRFPFLEYIHPRLGLLNVAAKMPHYSLQNDSGPKVIVSCGTYKESDAGDLLTSIHYSMRDMVYLLAHTSEGTKLETVRETNHGPREPDEKMGENESLVSPEEKLMDGEIHDLSPGRANTEKNESEMMSSVNPESHNMESSCTSSCAGGVQWDVFRRQDVPKLAEYLQRTFQKPDDSLKCDFVSRPLFEGLFLNEHHKRQLKDEFGVEPWTFEQHRGEAIFIPAGCPFQFRNLQSNVQVALDFLCPESVGESARLAEEIR
	BoJMJ28;b	Bol024304	C07	41989264	41993069	-	913	FPNHYAEILSSLPIPYYMDPKSGLLNIAAGLPDVIQAPNLGPCLNISYRSGDEYAKIDSLKKLGFETCDMVDILLHVTETVVSTKQICRIRKLMQNIGKVRSKNPERKEESRFCRGKKQDRIDTSYAQRDWSDDSSSSDSESSQHRLGSSEFKVEERESCNDSCEEGSLSSSCGAQWDVFRIQDVSKLLEYIKNHCLELVPMDSSKEQVSHPLLEQSYYLDEYHKARLKEEFDVEPWSFNQCVGEAVIVPAGCPYQNRKNKSCVNVVLNFLSPEHVAESIKLVDELN
	BoJMJ28;a	Bol028415	C01	7901205	7905376	-	885	FPNHYAEILRILPLPHYMDPRCGLLNVAADLPDSIQTPKLGPCLRISYRSGEDAKPDYVKKLGFETCDTVDILLHVTETLVCTKQICRIRKLMRNIGRLRSKNPEKGKQSKFGRGKKQDRNDASYAQRDCSDDYSSSDSESSQLCLGSEFQAEERESSNDSCVEENLSNSCGAQWDVFQTQDVSKLLEYMNNHYLELAPMDSTKTKSCVNAVLNFLSYEHVAESIKRVDELN
	BoJMJ26;a	Bol029088	C08	18327753	18331218	-	844	LPRHCDEFISALPFQEYSDPRSGVLNIATKLPEGVLKPDLGPKTYIAYGNADELGRGDSVTKLHCDMSDAVNILMHTAEVTLSKEQLTAIETLKLKHKQQDEKELQDQNDLDRGEIVTVNDEDGFHHDETGSALWDIFRREDVPKLEEYLRKHCREFRHTYCSPVTKVYHPIHDQTLFLTVEHKRKLKAEFGIEPWTFVQKVGEAVFIPAGCPHQVRNLKSCTKVAVDFVSPENIDECLRLTEEFR
	BoJMJ29;a	Bol030383	C09	33985898	33989713	+	866	NYLFCPRSLDVLKEEGLLHFQEHWKKGEPVIVGNALDNTHGLSWEPMVMWRALCENLDSTASSKMSEVKAIDCLANCEVNILTHTTEVTLSQEQISAVKDLKQKHREQNKLEEQGTEDDGIACGREEEGMNMPEILSYEKQQNHDETGSALWDIFRREDVPKLEEYLRKHCKEFRHTFCCPVTKVYHPIHDQSCYLTVEHKRKLKAEFGIEPWTFVQKLGEAVFIPAGCPHQVRNLKSCTKVAVDFVSPENIHECLRLTEEFR
	BnJMJ29;b	GSBRNA2T00000459001	chrC04	20120623	20128060	-	935	LPRHCDEFISALPFQEYSDPRTGILNIAAKLPEGLIKPDLGPKTYIAYGIPDELGRGDSVTKLHCDMSDAVNILTHTAEVTLSQEQISAVKDIKQKHKEQNRFETNGTGVACSQEEVEKNMPEILSHENDETGNALWDIFRREDIPKLEEYLRKHCKEFRHAYCCPVTKVYHPIHDQSCYLTVEHKRKLKAEFGIEPWTFVQKLGEAVFIPAGCPHQVRNLKSCTKVAVDFVSPENIKECLRLTEEFR
	BnJMJ29;c	GSBRNA2T00009174001	chrC09	10309642	10317938	+	970	LPRHCDEFISALPFQEYSDPRTGILNIAAKLPEGLIKPDLGPKTYIAYGIPDELGRGDSVTKLHCDMSDAVNILTHTTEVTLSQEQISAVKDLKQKHREQNKLEEQGTEDDGIACGREEEGMNMPEILSYEKQQNHDETGSALWDIFRREDVPKLEEYLRKHCKEFRHTFCCPVTKVYHPIHDQSCYLTVEHKRKLKAEFGIEPWTFVQKLGEAVFIPAGCPHQVRNLKSCTKVAVDFVSPENIHECLRLTEEFR
	BnJMJ26;a	GSBRNA2T00015184001	chrA08	17326999	17331312	+	850	LPRHCDEFISALPFQEYSDPRSGVLNIATKLPEGVLKPDLGPKTYIAYGNADELGRGDSVTKLHCDMSDAVNILMHTAEVTLSKEQLTAIEVLKKKHKQQDEKELQDQNDLDRGEIVAVNDENGFHHDETGSALWDIFRREDVPKLEEYLRKHCKEFRHTYCSPVTKVYHPIHDQTLFLTVEHKRKLKAEFGIEPWTFVQKVGEAVFIPAGCPHQVRNLKSCTKVAVDFVSPENIHECLRLTEEFR
	BnJMJ25;a	GSBRNA2T00038970001	chrC05	40731846	40739007	-	864	LPRHCEEFLCSLPLKQYTHPVSGPLNLAVKLPEKCLKPDMGPKTYVAYGFAQEMGRGDSVTKLHCDMSDAVNVLTHVSEVTIKEEEKKSTIEKLKRKHAAQDVKELFGSVPNYKEKIEILENTSEEEVKNLEADGGALWDIFRREDVPKLEKYLLSHHKEFRHFFCSPVSKVVHPIHDQSFYLTRYHKMILKEEYGIEPWTFVQKLGDAVLIPVGCPHQVRNLKSCTKVALDFVSPENISECFRLTKEYR
	BnJMJ28;a	GSBRNA2T00039329001	chrC01_random	392248	396555	+	917	FPNHHAEILRILPLPHYMDPRCGLLNVAADLPDSIQTPKLGPCLRISYRSGEDAKPDYVKKLGFETCDTVDILLHVTETLVCTKQICRIRKLMRNIGRVRSKNPEKGKQSKFGRGKKQDRNDASYAQRDCSDDYSSSDSESSQLCLGSEFQAEERESSNDSCVEESLSNSCGAQWDVFQTQDVSKLLEYMNNHYLELAPMDSTKTKASHPLLEQSYYLDEYHKERLKKEFDVEPWSFDQCVGEAVIVPAGCPYQNRKNKSCVNAVLNFLSPEHVAESIKRVDELN
	BnJMJ24;a	GSBRNA2T00047197001	chrA08	17965244	17969142	+	903	IFYQRPEFIRRFPFLEYIHPRLGLLNVAAKMPHYSLQNDSGPKVIVSCGTYKETDGGDSSNSIHYSMRDMVYLLVHTPEGTKLESVRETTNHGPGKADEKMGENESLVSPKEKLIDGELHDLSLGTSNTEKNESEMMLSVEPSCTSSCAGGVQWDVFRRQDVPKLAEYLQRTFQKPDDSLKCDFVSRPLFEGLFLNEHHKRQLKDEFGVEPWTFEQHRGEAIFIPAGCPFQFRNLQSNVQVALDFLCPESVGESARLAEEIR
	BnJMJ26;b	GSBRNA2T00047362001	chrC08	19733472	19737053	-	845	LPRHCDEFISALPFQEYSDPRSGVLNIATKLPEGVLKPDLGPKTYIAYGNADELGRGDSVTKLHCDMSDAVNILMHTAEVTLTKEQLSAIEALKKKHKQQDGKELQDQNDFDRGEIVTVSDEDGFHHDEAGSALWDIFRREDVPKLEEYLRKHCKEFRHTYCSPVTKVYHPIHDQTLFLTVEHKRKLKAEFGIEPWTFVQKVGEAVFIPAGCPHQVRNLKSCTKVAVDFVSPENIHECLRLTEEFR
	BnJMJ29;a	GSBRNA2T00051297001	chrA03_random	4878823	4885919	-	907	LPRHCDEFISALPFQEYSDPRTGILNIAAKLPEALIKPDLGPKTYIAYGIPDELGRGDSVTKLHCDMSDAVNILTHTAEITLSQEQISAVKDIKQKHKEQNKFEERGYGVACSQEEEEMNMTEILSHEKDETGSALWDIFRREDVPKLEEYLRKHFKEFRHAYCCPVTKVYHPIHDQSCYLTVEHKRKLKAEFGIEPWTFVQKLGEAVFIPAGCPHQVRNLKSCTKVAVDFVSPENIKECLRLTEEFR
	BnJMJ24;b	GSBRNA2T00051520001	chrCnn_random	5740235	5745086	-	869	IFYQRPEFIRRFPFLEYIHPRLGLLNVAAKMPHYSLQNDSGPKVIVSCGTYKESDAGDLLTSIHYSMRDMVYLLVHTSEGTKLETVRETNHGPREPDEKMGENESLVSPEEKLMDGEIHDLSPGRANTEKNESEMMSSHNMESSCTSSCAGGVQWDVFRRQDVPKLAEYLQRTFQKPDDSLKFDFVSRPLFEGLFLNEHHKRQLKDEFGVEPWTFEQHRGEAIFIPAGCPFQFRNLQSNVQVALDFLCPESVGESARLAEEIR
	BnJMJ25;b	GSBRNA2T00059504001	chrA05	20831412	20838585	-	1048	LPRHCEEFLCSLPLKQYTHPVSGPLNLAVKLPDFCLKPDMGPKTYVAYGFAQEMGRGDSVTKLHCDMSDAVSTLCHFSCTFSFLSCTWFSDGFPWYTHNDFITYHNNEIRFHFVKIRTKHIFLHIGLLPKPLSNHKNRSTKCLPRISADRLSRSTANCTEAEYRAITTQVLLQKSTIEKLKRKHAAQDVKELFGSVPNYKEKIEILENTNEEEVKNLEADGGALWDIFRREDVPKLEKYLLSHHKKFRHFFCSPVSKVVHPIHDQSFYLTRYHKMILKEEYGIEPWTFVQKLGDAVLIPVGCPHQVRNLKSCTKVALDFVSPENISECFRLTKEYR
	BnJMJ29;d	GSBRNA2T00070615001	chrA09	7496028	7499869	+	947	LPRHCDEFISALPFQEYSDPRTGILNIAAKLPEGLIKPDLGPKTYIAYGIPDELGRGDSVTKLHCDMSDAVNILTHTTEVTLSQEQISAVKDLKQKHKEQNKLEEQGSGDKDIACGREEEGMDMPEIMSYEKQQNHDETGSALWDIFRREDVPKLEEYLRKHCKEFRHTFCCPVTKVYHPIHDQSCYLTVEHKRKLKAEFGIEPWTFVQKLGEAVFIPAGCPHQVRNLKSCTKVAVDFVSPENIHECLRLTEEFR
	BnJMJ27;b	GSBRNA2T00091191001	chrA09	133682	134482	-	171	FEDNSWRQLGPVSMAHLKAMPVRVQRLCMVVLCGTSFEERMFQNLFEYLKKHEHEFRHLYNKPVDHPIIDQTMFLSESQKKQLKKEYDIEPWTFEQHLGEAVFIPAGCPYQVRNRQSCIKVALGFISPESVEECIRLTQEYM
	BnJMJ27;d	GSBRNA2T00091192001	chrA09	125807	131444	-	891	LPRHNDEFMSALPFFDYTDPESGILNLATRLPDGSLKPDLGPKTYIAYGFHEELNRGDSVTKLHCDVSDAVNVLTHTAKVDLTPRQYQRIRREQKSYAKAQLRKQQENKSLGEVDKDEIILIESEEDLKNCNGLLGEHSLKDKTAKEEPSNSIAGPSSSQEVDKLFFSKGESMEGSSSTYSCTVAMESSHDPKVDVGLITQENVTVKQESVADENHNDVCLKTERLSPKYPNEDGPTVENRLMMPTLPSTPPWDEEDRPPQRVVSTSAESIQEQKLDAPTETNESSKAVHGGAVWDIFRREDVPKLVEYLKRHKHEFRHLYNEPLKSVSHPIHDQSMFLNESQKKQLKEEFDIEPWTFVQHLGEAVFIPAGCPHQVRNIQSCIKVALDFVAPESVEECL…
	BnJMJ28;c	GSBRNA2T00106743001	chrA03	22708818	22713073	-	853	FPNHFAEILRILPIPYYMDPKRGILNIVAGLPDVIQAPNLGPCLSISYRSGEEYAKPDYVKKLGFETCDMVDILLHATETVVTTKQICRIRKLMQNIGKVRSKTPEKRKESRFDRGKIDTSYAQRDWSDESSSSDSESSQHRLGSSEFRVEGRESCNDSCEEGSLNNPCGAQWDVFQIQDVSKLLEYIKNHFLELVPIDSTKEQVSHPLFEQSYYLDEYHKARLKEEFDVEPWSFDQCVGEAVIVPAGCPYQNRKNKSCVNAVLNFLSPEHVAESIKLVEELS
	BnJMJ27;f	GSBRNA2T00112182001	chrA03	13160577	13167611	+	877	LKGRMDPKAKGMPSGILNLATRLPKESLKPDLGPKTYIAYGFPEELDGGDSVTKLHCDMSDAVNVLTHTAKVDIPPWQYKLVKKAKLRKQQSGQETEASECENKSVKEVENEEAALKKCDGLVGEETLKDKAANEEPSNSSSRPSSSHEDDKMFVSKGECTKTERDDPVEGSCSSKSGHDPKADAGLINEPITGENNNEVCLKTERLSPTNQSEDDPTVENGLMMPTALSTAPLDTDGSLPPPMESIKEEKMDSPKETEGNVTQSLDGSTSAESIKEQKHDAPKETNGNANESSEGVHGGAVWDIFRREDVPKLIEYLERHKHEFRHFFNEPVESVTHPIHDQTLFLTESQKKQLKEEFDIEPWTFVQHLGEAVFIPAGCPHQVRNIQSCIKVALDFVA…
	BnJMJ27;e	GSBRNA2T00112183001	chrA03	13157203	13159635	+	575	LPRHNSEFISALPFSVYTDAKSGIFNLATRLPKGSLKPDLGPKTYIAYGFPEELDGGDSVTKLHCDVSDAVNVLTHTAKVDIPPGQYKLVKKAQLRKQHVGQQTEASASENKSLKEVENEEAALKNCDGLVREESLKNKAGNKEPSNNSSKRSSSQEGKCITAMESDHDPKEAAGLIPQKNVTMTNESIADENHNDVCLKTERLSSEETNGNANESSKAVRGGAVWDIFRREDVPKLIEYLKRHKHEFRHFYNEPVKSVIHPIHDQSMFLSESQKKQLKEEFDIEPWTFEQHLGEAVFIPAGCPHQVRNIQSCIKVALGFVAPESVEECLRLTQEFR
	BnJMJ27;c	GSBRNA2T00123521001	chrCnn_random	1835168	1844656	+	781	LPRHNDEFMSALPFFDYTDPESGILNLATRLPDGSLKPDLGPKTYIAYGFHEELNRGDSVTKLHCDVSDAVNVLTHTTKVDLTPRQYQRIKLEQRRYAKAQLRKQQENKSLGEVDKDEIILIENEEDLKNCNGLLGEQSLKDKASKEEPSNSIAGPSRSQKGECTKVERADDPMEGSSNAPKETNESSKAVHGGAVWDIFRREDVPKLVEYLKRHKHEFRHLYNEPVKSVSHPIHDQSMFLNERQKKQLKEEFDIEPWTFVQHLGEAVFIPAGCPHQVRNIQSCIKVALDFVAPESVEECLRLTEEFR
	BnJMJ28;b	GSBRNA2T00131593001	chrA01	5605487	5610033	-	920	FPNHYAEILRILPLPHYMDPRCGLLNMAADLPDSIQTPKLGPCLSISYRSGEDAKLDYLKKLGFETCDTVDILLHVTETLVSTKQICRIRKLMRNIGRVRSKNPEKVKESRFGRGKKQDRNNASYVQRDLSDDYSSSDSESSQLCLGSEFQVEERESSSDSCVEESLSNSCGARWDVFQTQDVSKLLEYMNNHSLELAPMGSTKTKASHPLLEQSYYLDECHKAKLKEEFDVEPWSFDQCVGEAVIVPAGCPYQNKKNKSCVNAVLNFLSPEHVAESVKRMEELN
	BnJMJ27;a	GSBRNA2T00153486001	chrC03	19464922	19466338	+	239	ESGHDPKADAGLISQKNATLINEPIACENYNDVCLKTERLSPKYQIEDDPTVENGLMMPTLPSTPPWEKVDIPKRMCMVFLHICNQPVESVIHPIHDQSIFVNESQKKQLKKEFDIEPWTFEQHLGEAVFIPSGCPHQARNIQSCIKVALDFVAPESVEEYLRLTQEIR
	BnJMJ27;g	GSBRNA2T00153488001	chrC03	19476196	19486449	+	929	GYLKGRQDASGLLNLATRLPEESLKPDLGPKTYIAYGFPEELDGGDSVTKLHCDMSDAVNVLTHTAKVDIPSWQHKLVKKAKLRKQQSGQETEASECENKSVKEVVNEEAALKKWDGLVGEETLKDKAANEEPSNSSSRPSSSQEVDKMFVSKGECTKTERDDPVEGSCSSKSGHDPKADAGLINEPIAGENNSEVCLKTERLSPTNQSEDDPTVENGLMMPTALSTAPLDTDGSLPQPVESIKEEKLDSPKETEGNVTQSLDGSTSAESIQEQKHDAPKETNGNANESSEAVHGGAVWDIFRREDVPKLIEYLERHKHEFRHFFNEPVESVTHPIHDQTLFLTESQKKQLKEEFDIEPWTFVQHLGEAVFIPAGCPHQVRNIQSCIKVAVDFVAPENL…
	BnJMJ28;d	GSBRNA2T00156921001	chrC07	38652478	38656476	-	913	FPNHFAEILRILPIPYYMDPKRGLLNIAAGLPDVIQAPNLGPCLNISYRSGEEYAKPDYVKKLGFETCDMVDILLHVTETVVSTKQICRIRKLMQNIGKVRSKNPERKEESRFCRGKKQDRIDTSYAQRDWSDDSSSSDSESSQHRLGSSEFKVEERESCNDSCEEGSLSSSCGAQWDVFRIQDVSKLLEYIKNHCLELVPMDSSKEQVSHPLLEQSYYLDEYHKARLKEEFDVEPWSFNQCVGEAVIVPAGCPYQNRKNKSCVNVALNFLSPEHVAESIKLVDELN
	BnJMJ27;h	GSBRNA2T00123520001	chrCnn_random	1831723	1833110	+	262	FFSKELILTGMESDHNREAGDNYDDICLKTERLSPEYRSEDGPTVENGLMMPTLPSTPLWDEEDRPPQEQKLKAMPVDHPIIDQTKFLSESQKKQLKKDYDIEPWTFEQHLGEAVFIPACCPHQVRNRQSCIKVALGFISPESVEECIRLTQECK
The information of Arabidopsis thaliana was obtained from TAIR database(http://www.arabidopsis.org/) and Brassica from Brassica database (http://brassicadb.org/brad/blastPage.php)

## Sheet: Sheet2
AT
	AtJMJ11
