# Supplementary material for: Systematic analysis of JmjC gene family and stress­-response expression of KDM5 subfamily genes in Brassica napus
Source: PeerJ. 2021 Mar 31;9:e11137. doi: 10.7717/peerj.11137 (PMC8019318; doi:10.7717/peerj.11137)
Supplement: Supplemental Information 2 — Ka and Ks were calculated by DnaSP 6.0; Cover of CDS and Identify of protein was checked by NCBI. [file peerj-09-11137-s002.xlsx]

## Sheet: Sheet1 (2)
Duplicated gene pairs	site of chromosome	Ka	Ks	Ka/Ks	Cover of CDS %	Identify of protein %	Mode of Selection	Date (Mya)	Duplicate Typ
BnJMJ14;a/BrJMJ14;b	A01	0.0045	0.0316	0.142405	100	99	negative selection	2.10667	Segmental
BnJMJ13;d/BrJMJ13;a	A02	0.007	0.018	0.388889	100	98	negative selection	1.2	Segmental
BnJMJ31;b/BrJMJ31	A03	0.0101	0.0149	0.677852	100	98	negative selection	0.993333	Segmental
BnJMJ19;e/BrJMJ19;a	A03	0.0024	0.0041	0.585366	100	97	negative selection	0.273333	Segmental
BnJMJ27;e/BrJMJ27;b	A03	0.0137	0.0166	0.825301	96	95	negative selection	1.10667	Segmental
BnJMJ27;f/BrJMJ27;a	A03	0.0319	0.0994	0.320926	98	86	negative selection	6.62667	Segmental
BnJMJ28;c/BrJMJ28	A03	0.0215	0.0536	0.401119	100	96	negative selection	3.57333	Segmental
BnJMJ15;b/BrJMJ15;a	A04	0.007	0.0258	0.271318	98	94	negative selection	1.72	Segmental
BnJMJ15;c/BrJMJ15;b	A04	0.0044	0.0241	0.182573	99	99	negative selection	1.60667	Segmental
BnJMJ19;a/BrJMJ19;b	A05	0.0083	0.031	0.267742	90	93	negative selection	2.06667	Segmental
BnJMJ30;a/BrJMJ30	A05	0.0011	0.0034	0.323529	100	99	negative selection	0.226667	Segmental
BnJMJ25;b/BrJMJ25	A05	0.0397	0.069	0.575362	89	93	negative selection	4.6	Segmental
BnJMJ16;d/BrJMJ16;a	A06	0.0117	0.0633	0.184834	100	95	negative selection	4.22	Segmental
BnJMJ12;b/BrJMJ12	A06	0.0036	0.0133	0.270677	100	95	negative selection	0.886667	Segmental
BnJMJ32;a/BrJMJ32	A06	0.0064	0.0406	0.157635	100	98	negative selection	2.70667	Segmental
BnJMJ21;b/BrJMJ21	A07	0.0009	0.0016	0.5625	100	99	negative selection	0.106667	Segmental
BnJMJ18;d/BrJMJ18;a	A08	0.0109	0.0424	0.257075	100	96	negative selection	2.82667	Segmental
BnJMJ26;a/BrJMJ26	A08	0.0084	0.0445	0.188764	97	97	negative selection	2.96667	Segmental
BnJMJ24;a/BrJMJ24	A08	0.0024	0.0132	0.181818	100	99	negative selection	0.88	Segmental
BnJMJ16;a/BrJMJ16;b	A08	0.0111	0.0722	0.15374	100	97	negative selection	4.81333	Segmental
BnJMJ27;d/BrJMJ27;c	A09	0.0394	0.01093	3.60476	99	91	negative selection	0.728667	Segmental
BnJMJ20;a/BrJMJ20	A09	0.1809	0.2508	0.721292	84	79	negative selection	16.72	Segmental
BnJMJ17;a/BrJMJ17	A09	0.0139	0.0555	0.25045	99	97	negative selection	3.7	Segmental
BnJMJ29;d/BrJMJ29	A09	0.012	0.0293	0.409556	92	92	negative selection	1.95333	Segmental
BnJMJ18;a/BrJMJ18;b	A09	0.0108	0.0135	0.8	95	100	negative selection	0.9	Segmental
BnJMJ22;a/BrJMJ22	A10	0.0053	0.0722	0.0734072	100	95	negative selection	4.81333	Segmental
BnJMJ11;b/BrJMJ11	A10	0.0004	0.0159	0.0251572	100	96	negative selection	1.06	Segmental
BnJMJ14;b/BoJMJ14;a	C01	0.0196	0.0097	2.02062	100	96	positive selection	0.646667	Segmental
BnJMJ28;a/BoJMJ28;a	C01	0.0079	0.0144	0.548611	94	90	negative selection	0.96	Segmental
BnJMJ21;a/BoJMJ21;a	C02	0.0247	0.0241	1.0249	65	97	positive selection	1.60667	Segmental
BnJMJ13;e/BoJMJ13;c	C02	0	0		100	100	negative selection	0	Segmental
BnJMJ19;c/BoJMJ19;b	C03	0.0112	0.0244	0.459016	90	81	negative selection	1.62667	Segmental
BnJMJ32;b/BoJMJ32;a	C03	0.0032	0.01	0.32	99	99	negative selection	0.666667	Segmental
BnJMJ19;b/BoJMJ19;a	C04	0	0		84	100	negative selection	0	Segmental
BnJMJ15;a/BoJMJ15;a	C05	0.0201	0.0144	1.39583	96	98	positive selection	0.96	Segmental
BnJMJ30;b/BoJMJ30;a	C05	0	0.0034	0	100	100	negative selection	0.226667	Segmental
BnJMJ25;a/BoJMJ25;a	C05	0.0211	0.0179	1.17877	100	90	positive selection	1.19333	Segmental
BnJMJ21;c/BoJMJ21;b	C06	0.0086	0.0485	0.17732	95	98	negative selection	3.23333	Segmental
BnJMJ13;c/BoJMJ13;b	C07	0.0005	0.0018	0.277778	100	99	negative selection	0.12	Segmental
BnJMJ28;d/BoJMJ28;b	C07	0.0165	0.0434	0.380184	100	96	negative selection	2.89333	Segmental
BnJMJ26;b/BoJMJ26;a	C08	0.013	0.0663	0.196078	99	97	negative selection	4.42	Segmental
BnJMJ29;c/BoJMJ29;a	C09	0.0216	0.0209	1.03349	85	96	positive selection	1.39333	Segmental
BnJMJ13;b/BoJMJ13;a	C09	0.0111	0.0206	0.538835	99	97	negative selection	1.37333	Segmental
BnJMJ22;b/BoJMJ22;a	C09	0.0134	0.046	0.291304	100	97	negative selection	3.06667	Segmental
BnJMJ17;c/BnJMJ17;a	A09	0.0298	0.0684	0.435673	94	99	negative selection	4.56	Segmental
BrJMJ27;b/BrJMJ27;a	A03	0.1372	0.139	0.98705	87	77	negative selection	9.26667	Segmental
BnJMJ18;d/BnJMJ18;c	A08/C08	0.0232	0.0786	0.295165	99	94	negative selection	5.24	Segmental
BnJMJ15;b/BnJMJ15;c	A04/A04	0.0382	0.1075	0.355349	79	88	negative selection	7.16667	Segmental
BnJMJ18;a/BnJMJ18;b	A09/C05	0.0191	0.0859	0.222352	95	97	negative selection	5.72667	Segmental
BnJMJ16;b/BnJMJ16;a	chrAnn_random/A08	0.0292	0.1216	0.240132	94	93	negative selection	8.10667	Segmental
BnJMJ16;e/BnJMJ16;a	C08/A08	0.0094	0.1433	0.0655967	96	97	negative selection	9.55333	Segmental
BnJMJ16;e/BnJMJ16;b	chrAnn_random/C08	0.9813	0.9865	0.994729	28	97	negative selection	65.7667	Segmental
BnJMJ20;a/BnJMJ20;b	A09/chrCnn_random	0.0192	0.0936	0.205128	100	95	negative selection	6.24	Segmental
BnJMJ31;a/BnJMJ31;b	C03/A03	0.0294	0.1063	0.276576	97	94	negative selection	7.08667	Segmental
BnJMJ28;a/BnJMJ28;b	C01/A01	0.0245	0.0862	0.284223	100	93	negative selection	5.74667	Segmental
BnJMJ27;c/BnJMJ27;d	chrCnn_random/A09	0.0447	0.1441	0.310201	99	81	negative selection	9.60667	Segmental
BnJMJ27;a/BnJMJ27;h	C03/chrCnn_random	0.2339	0.5054	0.462802	17	67	negative selection	33.6933	Segmental
BnJMJ26;a/BnJMJ26;b	A08/C08	0.0236	0.1458	0.161866	99	94	negative selection	9.72	Segmental
BnJMJ29;c/BnJMJ29;d	C09/A09	0.0343	0.0729	0.470508	95	93	negative selection	4.86	Segmental
BnJMJ17;a/BnJMJ17;b	A08/C08	0.0498	0.0763	0.652687	86	95	negative selection	5.08667	Segmental
BnJMJ27;a/BnJMJ27;d	C03/A09	0.1444	0.3677	0.392711	28	60	negative selection	24.5133	Segmental
BnJMJ16;a/BnJMJ16;d	A08/A06	0.0825	0.3707	0.222552	91	80	negative selection	24.7133	Segmental
BnJMJ16;e/BnJMJ16;d	C08/A06	0.0448	0.3639	0.123111	100	87	negative selection	24.26	Segmental
BnJMJ27;a/BnJMJ27;f	C03/A03	0.3232	0.3644	0.886937	72	81	negative selection	24.2933	Segmental
BnJMJ27;a/BnJMJ27;g	C03	0.3465	0.3605	0.961165	72	80	negative selection	24.0333	Segmental
BnJMJ27;a/BnJMJ27;e	C03/A03	0.2102	0.224	0.938393	70	66	negative selection	14.9333	Segmental
BnJMJ27;g/BnJMJ27;f	C03/A03	0.0488	0.0423	1.15366	93	92	positive selection	2.82	Segmental
BnJMJ27;e/BnJMJ27;f	A03	0.1422	0.1368	1.03947	81	62	positive selection	9.12	Segmental
BnJMJ27;b/BnJMJ27;d	A09	0.3006	0.3164	0.950063	No significant similarity found	68	negative selection	21.0933	Segmental
BnJMJ27;a/BnJMJ27;b	C03/A09	0.38	0.3577	1.06234	No significant similarity found	71	positive selection	23.8467	Segmental
BnJMJ27;b/BnJMJ27;h	A09/chrCnn_random	0.2816	0.4853	0.58026	54	93	negative selection	32.3533	Segmental
BnJMJ27;b/BnJMJ27;f	A09/A02	0.1987	0.2722	0.729978	80	73	negative selection	18.1467	Segmental
BnJMJ27;b/BnJMJ27;g	A09/C03	0.1804	0.3541	0.509461	85	72	negative selection	23.6067	Segmental
BnJMJ27;b/BnJMJ27;c	A09/chrCnn_random	0.0442	0.1466	0.301501	78	75	negative selection	9.77333	Segmental
BnJMJ29;a/BnJMJ29;b	A03/C04	0.0309	0.0979	0.315628	98	88	negative selection	6.52667	Segmental
BnJMJ29;a/BnJMJ29;c	A03/C09	0.2113	0.1527	1.38376	77	99	positive selection	10.18	Segmental
BnJMJ29;a/BnJMJ29;d	A03/A09	0.1451	0.4936	0.293963	74	68	negative selection	32.9067	Segmental
BnJMJ29;b/BnJMJ29;c	C04/C09	0.1395	0.438	0.318493	83	68	negative selection	29.2	Segmental
BnJMJ29;b/BnJMJ29;d	C04/A09	0.2102	0.1824	1.15241	81	95	positive selection	12.16	Segmental
BnJMJ17;c/BnJMJ17;a	A09/A08	0.0298	0.0684	0.435673	34	99	negative selection	4.56	Segmental
BnJMJ17;c/BnJMJ17;b	A09/C08	0.1545	0.1877	0.823122	65	95	negative selection	12.5133	Segmental
BnJMJ16;c/BnJMJ16;a	C05/A08	0.1125	0.2974	0.378278	93	79	negative selection	19.8267	Segmental
BnJMJ16;b/BnJMJ16;c	chrAnn_random/C05	0.1317	0.2849	0.462267	85	77	negative selection	18.9933	Segmental
BnJMJ16;c/BnJMJ16;d	C05/A06	0.0242	0.1147	0.210985	98	92	negative selection	7.64667	Segmental
BnJMJ16;e/BnJMJ16;c	C08/C05	0.065	0.3597	0.180706	99	85	negative selection	23.98	Segmental
									Segmental
