# Supplementary material for: Systematic analysis of JmjC gene family and stress­-response expression of KDM5 subfamily genes in Brassica napus
Source: PeerJ. 2021 Mar 31;9:e11137. doi: 10.7717/peerj.11137 (PMC8019318; doi:10.7717/peerj.11137)
Supplement: Supplemental Information 5 [file peerj-09-11137-s005.xlsx]

## Sheet: Drought stress
Target	Sample	Cq Mean
Bnactin	xy15-Dry 0d-1	28.2788
Bnactin	xy15-Dry 0d-2	28.2682
Bnactin	xy15-Dry 0d-3	28.0869
Bnactin	xy15-Dry 5d-1	26.8518
Bnactin	xy15-Dry 5d-2	27.0521
Bnactin	xy15-Dry 5d-3	26.9573
Bnactin	xy15-Dry 10d-1	28.2413
Bnactin	xy15-Dry 10d-2	28.3063
Bnactin	xy15-Dry 10d-3	28.1465
Bnactin	xy15-Dry 15d-1	28.6621
Bnactin	xy15-Dry 15d-2	28.7494
Bnactin	xy15-Dry 15d-3	28.8461
BnJMJ16;b	xy15-Dry 0d-1	30.1536
BnJMJ16;b	xy15-Dry 0d-2	29.9824
BnJMJ16;b	xy15-Dry 0d-3	29.9148
BnJMJ16;b	xy15-Dry 5d-1	28.8626
BnJMJ16;b	xy15-Dry 5d-2	28.7074
BnJMJ16;b	xy15-Dry 5d-3	28.9982
BnJMJ16;b	xy15-Dry 10d-1	28.3545
BnJMJ16;b	xy15-Dry 10d-2	28.8474
BnJMJ16;b	xy15-Dry 10d-3	29.2496
BnJMJ16;b	xy15-Dry 15d-1	29.705
BnJMJ16;b	xy15-Dry 15d-2	29.9847
BnJMJ16;b	xy15-Dry 15d-3	30.4432
BnJMJ16;c	xy15-Dry 0d-1	32.1998
BnJMJ16;c	xy15-Dry 0d-2	31.7013
BnJMJ16;c	xy15-Dry 0d-3	31.2302
BnJMJ16;c	xy15-Dry 5d-1	29.7368
BnJMJ16;c	xy15-Dry 5d-2	28.5278
BnJMJ16;c	xy15-Dry 5d-3	29.0693
BnJMJ16;c	xy15-Dry 10d-1	29.5603
BnJMJ16;c	xy15-Dry 10d-2	29.6454
BnJMJ16;c	xy15-Dry 10d-3	29.5036
BnJMJ16;c	xy15-Dry 15d-1	30.5467
BnJMJ16;c	xy15-Dry 15d-2	30.9787
BnJMJ16;c	xy15-Dry 15d-3	31.0668
BnJMJ17;c	xy15-Dry 0d-1	33.9723
BnJMJ17;c	xy15-Dry 0d-2	34.4915
BnJMJ17;c	xy15-Dry 0d-3	33.3071
BnJMJ17;c	xy15-Dry 5d-1	31.7015
BnJMJ17;c	xy15-Dry 5d-2	31.8243
BnJMJ17;c	xy15-Dry 5d-3	31.6207
BnJMJ17;c	xy15-Dry 10d-1	32.8316
BnJMJ17;c	xy15-Dry 10d-2	32.7759
BnJMJ17;c	xy15-Dry 10d-3	32.9302
BnJMJ17;c	xy15-Dry 15d-1	33.1446
BnJMJ17;c	xy15-Dry 15d-2	33.0848
BnJMJ17;c	xy15-Dry 15d-3	33.1317
Bnactin	xy15-Dry 0d-1	28.0114
Bnactin	xy15-Dry 0d-2	27.8674
Bnactin	xy15-Dry 0d-3	27.8096
Bnactin	xy15-Dry 5d-1	26.7125
Bnactin	xy15-Dry 5d-2	26.7528
Bnactin	xy15-Dry 5d-3	26.525
Bnactin	xy15-Dry 10d-1	27.6412
Bnactin	xy15-Dry 10d-2	27.6968
Bnactin	xy15-Dry 10d-3	27.62
Bnactin	xy15-Dry 15d-1	27.2874
Bnactin	xy15-Dry 15d-2	27.4416
Bnactin	xy15-Dry 15d-3	27.5925
BnJMJ18;c	xy15-Dry 0d-1	32.5732
BnJMJ18;c	xy15-Dry 0d-2	32.6415
BnJMJ18;c	xy15-Dry 0d-3	32.4398
BnJMJ18;c	xy15-Dry 5d-1	29.9097
BnJMJ18;c	xy15-Dry 5d-2	29.6737
BnJMJ18;c	xy15-Dry 5d-3	30.5488
BnJMJ18;c	xy15-Dry 10d-1	29.7925
BnJMJ18;c	xy15-Dry 10d-2	29.5483
BnJMJ18;c	xy15-Dry 10d-3	29.664
BnJMJ18;c	xy15-Dry 15d-1	31.3342
BnJMJ18;c	xy15-Dry 15d-2	30.8348
BnJMJ18;c	xy15-Dry 15d-3	30.4193
BnJMJ18;d	xy15-Dry 0d-1	33.962
BnJMJ18;d	xy15-Dry 0d-2	34.0751
BnJMJ18;d	xy15-Dry 0d-3	33.8454
BnJMJ18;d	xy15-Dry 5d-1	30.5929
BnJMJ18;d	xy15-Dry 5d-2	31.6139
BnJMJ18;d	xy15-Dry 5d-3	31.0655
BnJMJ18;d	xy15-Dry 10d-1	31.1554
BnJMJ18;d	xy15-Dry 10d-2	31.3656
BnJMJ18;d	xy15-Dry 10d-3	31.2564
BnJMJ18;d	xy15-Dry 15d-1	32.5378
BnJMJ18;d	xy15-Dry 15d-2	32.3942
BnJMJ18;d	xy15-Dry 15d-3	32.2265
BnJMJ19;b	xy15-Dry 0d-1	31.4951
BnJMJ19;b	xy15-Dry 0d-2	31.6411
BnJMJ19;b	xy15-Dry 0d-3	31.7726
BnJMJ19;b	xy15-Dry 5d-1	29.3249
BnJMJ19;b	xy15-Dry 5d-2	29.6874
BnJMJ19;b	xy15-Dry 5d-3	30.2729
BnJMJ19;b	xy15-Dry 10d-1	30.313
BnJMJ19;b	xy15-Dry 10d-2	29.6893
BnJMJ19;b	xy15-Dry 10d-3	30.981
BnJMJ19;b	xy15-Dry 15d-1	30.0258
BnJMJ19;b	xy15-Dry 15d-2	29.6879
BnJMJ19;b	xy15-Dry 15d-3	30.5314
BnJMJ19;c	xy15-Dry 0d-1	30.1358
BnJMJ19;c	xy15-Dry 0d-2	30.0293
BnJMJ19;c	xy15-Dry 0d-3	29.882
BnJMJ19;c	xy15-Dry 5d-1	28.2636
BnJMJ19;c	xy15-Dry 5d-2	28.8716
BnJMJ19;c	xy15-Dry 5d-3	27.7998
BnJMJ19;c	xy15-Dry 10d-1	29.126
BnJMJ19;c	xy15-Dry 10d-2	29.6899
BnJMJ19;c	xy15-Dry 10d-3	29.3871
BnJMJ19;c	xy15-Dry 15d-1	29.4094
BnJMJ19;c	xy15-Dry 15d-2	29.5241
BnJMJ19;c	xy15-Dry 15d-3	29.6037
BnJMJ19;e	xy15-Dry 0d-1	33.9802
BnJMJ19;e	xy15-Dry 0d-2	33.7284
BnJMJ19;e	xy15-Dry 0d-3	33.8056
BnJMJ19;e	xy15-Dry 5d-1	32.8623
BnJMJ19;e	xy15-Dry 5d-2	32.726
BnJMJ19;e	xy15-Dry 5d-3	33.0244
BnJMJ19;e	xy15-Dry 10d-1	32.6102
BnJMJ19;e	xy15-Dry 10d-2	33.101
BnJMJ19;e	xy15-Dry 10d-3	33.4378
BnJMJ19;e	xy15-Dry 15d-1	33.6897
BnJMJ19;e	xy15-Dry 15d-2	33.3201
BnJMJ19;e	xy15-Dry 15d-3	33.8914
Bnactin	xy15-Dry 0d-1	28.0235
Bnactin	xy15-Dry 0d-2	28.034
Bnactin	xy15-Dry 0d-3	27.8173
Bnactin	xy15-Dry 5d-1	29.7681
Bnactin	xy15-Dry 5d-2	29.9759
Bnactin	xy15-Dry 5d-3	29.8554
Bnactin	xy15-Dry 10d-1	27.3129
Bnactin	xy15-Dry 10d-2	27.4619
Bnactin	xy15-Dry 10d-3	27.3244
Bnactin	xy15-Dry 15d-1	27.7885
Bnactin	xy15-Dry 15d-2	27.6802
Bnactin	xy15-Dry 15d-3	28.0417
BnJMJ14;a	xy15-Dry 0d-1	29.6353
BnJMJ14;a	xy15-Dry 0d-2	29.3211
BnJMJ14;a	xy15-Dry 0d-3	29.3736
BnJMJ14;a	xy15-Dry 5d-1	31.5117
BnJMJ14;a	xy15-Dry 5d-2	31.8084
BnJMJ14;a	xy15-Dry 5d-3	31.6449
BnJMJ14;a	xy15-Dry 10d-1	28.7872
BnJMJ14;a	xy15-Dry 10d-2	28.0693
BnJMJ14;a	xy15-Dry 10d-3	28.28
BnJMJ14;a	xy15-Dry 15d-1	29.3025
BnJMJ14;a	xy15-Dry 15d-2	29.4666
BnJMJ14;a	xy15-Dry 15d-3	29.5051
BnJMJ14;b	xy15-Dry 0d-1	30.0635
BnJMJ14;b	xy15-Dry 0d-2	30.0013
BnJMJ14;b	xy15-Dry 0d-3	29.7929
BnJMJ14;b	xy15-Dry 5d-1	31.0546
BnJMJ14;b	xy15-Dry 5d-2	30.6446
BnJMJ14;b	xy15-Dry 5d-3	31.4015
BnJMJ14;b	xy15-Dry 10d-1	28.5427
BnJMJ14;b	xy15-Dry 10d-2	28.1146
BnJMJ14;b	xy15-Dry 10d-3	27.6919
BnJMJ14;b	xy15-Dry 15d-1	29.9367
BnJMJ14;b	xy15-Dry 15d-2	30.1794
BnJMJ14;b	xy15-Dry 15d-3	30.1682
BnJMJ16;a	xy15-Dry 0d-1	31.9057
BnJMJ16;a	xy15-Dry 0d-2	32.1649
BnJMJ16;a	xy15-Dry 0d-3	31.994
BnJMJ16;a	xy15-Dry 5d-1	32.0696
BnJMJ16;a	xy15-Dry 5d-2	31.8871
BnJMJ16;a	xy15-Dry 5d-3	32.0299
BnJMJ16;a	xy15-Dry 10d-1	34.9819
BnJMJ16;a	xy15-Dry 10d-2	34.0105
BnJMJ16;a	xy15-Dry 10d-3	32.2274
BnJMJ16;a	xy15-Dry 15d-1	36.3804
BnJMJ16;a	xy15-Dry 15d-2	36.2196
BnJMJ16;a	xy15-Dry 15d-3	36.5058
BnJMJ16;d	xy15-Dry 0d-1	31.5049
BnJMJ16;d	xy15-Dry 0d-2	30.4818
BnJMJ16;d	xy15-Dry 0d-3	30.9238
BnJMJ16;d	xy15-Dry 5d-1	31.8132
BnJMJ16;d	xy15-Dry 5d-2	31.7694
BnJMJ16;d	xy15-Dry 5d-3	31.5922
BnJMJ16;d	xy15-Dry 10d-1	30.1141
BnJMJ16;d	xy15-Dry 10d-2	30.1459
BnJMJ16;d	xy15-Dry 10d-3	30.0295
BnJMJ16;d	xy15-Dry 15d-1	30.7037
BnJMJ16;d	xy15-Dry 15d-2	30.6362
BnJMJ16;d	xy15-Dry 15d-3	30.9107
Bnactin	xy15-Dry 0d-1	27.2567
Bnactin	xy15-Dry 0d-2	26.9467
Bnactin	xy15-Dry 0d-3	27.0554
Bnactin	xy15-Dry 5d-1	27.1499
Bnactin	xy15-Dry 5d-2	27.1161
Bnactin	xy15-Dry 5d-3	27.1573
Bnactin	xy15-Dry 10d-1	26.3723
Bnactin	xy15-Dry 10d-2	26.5608
Bnactin	xy15-Dry 10d-3	26.5577
Bnactin	xy15-Dry 15d-1	27.1971
Bnactin	xy15-Dry 15d-2	26.9462
Bnactin	xy15-Dry 15d-3	27.1763
BnJMJ15;a	xy15-Dry 0d-1	34.3035
BnJMJ15;a	xy15-Dry 0d-2	34.2185
BnJMJ15;a	xy15-Dry 0d-3	34.4631
BnJMJ15;a	xy15-Dry 5d-1	31.3606
BnJMJ15;a	xy15-Dry 5d-2	31.5101
BnJMJ15;a	xy15-Dry 5d-3	31.2893
BnJMJ15;a	xy15-Dry 10d-1	33.5752
BnJMJ15;a	xy15-Dry 10d-2	33.449
BnJMJ15;a	xy15-Dry 10d-3	33.7204
BnJMJ15;a	xy15-Dry 15d-1	39.5072
BnJMJ15;a	xy15-Dry 15d-2	39.4764
BnJMJ15;a	xy15-Dry 15d-3	39.4798
BnJMJ15;c	xy15-Dry 0d-1	32.3281
BnJMJ15;c	xy15-Dry 0d-2	32.4098
BnJMJ15;c	xy15-Dry 0d-3	32.18
BnJMJ15;c	xy15-Dry 5d-1	30.2543
BnJMJ15;c	xy15-Dry 5d-2	30.4798
BnJMJ15;c	xy15-Dry 5d-3	30.4623
BnJMJ15;c	xy15-Dry 10d-1	32.0675
BnJMJ15;c	xy15-Dry 10d-2	33.0698
BnJMJ15;c	xy15-Dry 10d-3	33.9179
BnJMJ15;c	xy15-Dry 15d-1	37.5471
BnJMJ15;c	xy15-Dry 15d-2	37.8367
BnJMJ15;c	xy15-Dry 15d-3	37.6606
BnJMJ17;a	xy15-Dry 0d-1	36.9088
BnJMJ17;a	xy15-Dry 0d-2	36.628
BnJMJ17;a	xy15-Dry 0d-3	36.6714
BnJMJ17;a	xy15-Dry 5d-1	34.8675
BnJMJ17;a	xy15-Dry 5d-2	34.5077
BnJMJ17;a	xy15-Dry 5d-3	35.3308
BnJMJ17;a	xy15-Dry 10d-1	32.465
BnJMJ17;a	xy15-Dry 10d-2	32.3586
BnJMJ17;a	xy15-Dry 10d-3	32.2308
BnJMJ17;a	xy15-Dry 15d-1	36.7448
BnJMJ17;a	xy15-Dry 15d-2	36.4877
BnJMJ17;a	xy15-Dry 15d-3	36.8569
BnJMJ17;b	xy15-Dry 0d-1	35.5107
BnJMJ17;b	xy15-Dry 0d-2	35.5134
BnJMJ17;b	xy15-Dry 0d-3	35.2959
BnJMJ17;b	xy15-Dry 5d-1	33.1846
BnJMJ17;b	xy15-Dry 5d-2	33.4283
BnJMJ17;b	xy15-Dry 5d-3	33.1499
BnJMJ17;b	xy15-Dry 10d-1	31.2957
BnJMJ17;b	xy15-Dry 10d-2	31.1852
BnJMJ17;b	xy15-Dry 10d-3	31.1331
BnJMJ17;b	xy15-Dry 15d-1	35.4615
BnJMJ17;b	xy15-Dry 15d-2	36.6959
BnJMJ17;b	xy15-Dry 15d-3	36.074
BnJMJ18;a	xy15-Dry 0d-1	34.511
BnJMJ18;a	xy15-Dry 0d-2	34.4558
BnJMJ18;a	xy15-Dry 0d-3	34.2379
BnJMJ18;a	xy15-Dry 5d-1	31.9717
BnJMJ18;a	xy15-Dry 5d-2	31.9636
BnJMJ18;a	xy15-Dry 5d-3	31.9341
BnJMJ18;a	xy15-Dry 10d-1	30.621
BnJMJ18;a	xy15-Dry 10d-2	30.6419
BnJMJ18;a	xy15-Dry 10d-3	30.8646
BnJMJ18;a	xy15-Dry 15d-1	35.0344
BnJMJ18;a	xy15-Dry 15d-2	34.4686
BnJMJ18;a	xy15-Dry 15d-3	35.6644
BnJMJ18;b	xy15-Dry 0d-1	29.4678
BnJMJ18;b	xy15-Dry 0d-2	29.2261
BnJMJ18;b	xy15-Dry 0d-3	29.2921
BnJMJ18;b	xy15-Dry 5d-1	28.3545
BnJMJ18;b	xy15-Dry 5d-2	27.7584
BnJMJ18;b	xy15-Dry 5d-3	28.9499
BnJMJ18;b	xy15-Dry 10d-1	27.415
BnJMJ18;b	xy15-Dry 10d-2	27.4199
BnJMJ18;b	xy15-Dry 10d-3	27.32
BnJMJ18;b	xy15-Dry 15d-1	29.4107
BnJMJ18;b	xy15-Dry 15d-2	29.3479
BnJMJ18;b	xy15-Dry 15d-3	29.3218
Bnactin	xy15-Dry 0d-1	27.9478
Bnactin	xy15-Dry 0d-2	27.8336
Bnactin	xy15-Dry 0d-3	27.7078
Bnactin	xy15-Dry 5d-1	28.2711
Bnactin	xy15-Dry 5d-2	28.0268
Bnactin	xy15-Dry 5d-3	28.0215
Bnactin	xy15-Dry 10d-1	28.5764
Bnactin	xy15-Dry 10d-2	28.7728
Bnactin	xy15-Dry 10d-3	28.8716
Bnactin	xy15-Dry 15d-1	27.4872
Bnactin	xy15-Dry 15d-2	27.6798
Bnactin	xy15-Dry 15d-3	27.7358
BnJMJ19;a	xy15-Dry 0d-1	31.9261
BnJMJ19;a	xy15-Dry 0d-2	31.9993
BnJMJ19;a	xy15-Dry 0d-3	31.8964
BnJMJ19;a	xy15-Dry 5d-1	31.0153
BnJMJ19;a	xy15-Dry 5d-2	31.7568
BnJMJ19;a	xy15-Dry 5d-3	31.546
BnJMJ19;a	xy15-Dry 10d-1	32.358
BnJMJ19;a	xy15-Dry 10d-2	32.3642
BnJMJ19;a	xy15-Dry 10d-3	32.1561
BnJMJ19;a	xy15-Dry 15d-1	31.7751
BnJMJ19;a	xy15-Dry 15d-2	31.6507
BnJMJ19;a	xy15-Dry 15d-3	31.6531
BnJMJ15;b	xy15-Dry 0d-1	37.1544
BnJMJ15;b	xy15-Dry 0d-2	37.3863
BnJMJ15;b	xy15-Dry 0d-3	37.1013
BnJMJ15;b	xy15-Dry 5d-1	36.9184
BnJMJ15;b	xy15-Dry 5d-2	36.4064
BnJMJ15;b	xy15-Dry 5d-3	35.7458
BnJMJ15;b	xy15-Dry 10d-1	39.1647
BnJMJ15;b	xy15-Dry 10d-2	38.7337
BnJMJ15;b	xy15-Dry 10d-3	39.1082
BnJMJ15;b	xy15-Dry 15d-1	39.5216
BnJMJ15;b	xy15-Dry 15d-2	38.2865
BnJMJ15;b	xy15-Dry 15d-3	37.3989

## Sheet: High tempture stress
Target	Sample	Cq Mean
Bnactin	xy15-HT 0h-1	27.476
Bnactin	xy15-HT 0h-2	27.3243
Bnactin	xy15-HT 0h-3	27.1879
Bnactin	xy15-HT 12h-1	26.7371
Bnactin	xy15-HT 12h-2	26.9103
Bnactin	xy15-HT 12h-3	26.5792
Bnactin	xy15-HT 24h-1	26.5476
Bnactin	xy15-HT 24h-2	26.7493
Bnactin	xy15-HT 24h-3	26.4923
Bnactin	xy15-HT 36h-1	28.3309
Bnactin	xy15-HT 36h-2	28.4435
Bnactin	xy15-HT 36h-3	28.5507
BnJMJ17;c	xy15-HT 0h-1	32.7241
BnJMJ17;c	xy15-HT 0h-2	32.6438
BnJMJ17;c	xy15-HT 0h-3	32.5014
BnJMJ17;c	xy15-HT 12h-1	30.766
BnJMJ17;c	xy15-HT 12h-2	31.2074
BnJMJ17;c	xy15-HT 12h-3	31.6482
BnJMJ17;c	xy15-HT 24h-1	31.0912
BnJMJ17;c	xy15-HT 24h-2	31.5264
BnJMJ17;c	xy15-HT 24h-3	30.4894
BnJMJ17;c	xy15-HT 36h-1	32.8912
BnJMJ17;c	xy15-HT 36h-2	32.1473
BnJMJ17;c	xy15-HT 36h-3	32.5422
BnJMJ19;e	xy15-HT 0h-1	33.0192
BnJMJ19;e	xy15-HT 0h-2	32.9855
BnJMJ19;e	xy15-HT 0h-3	33.004
BnJMJ19;e	xy15-HT 12h-1	32.3629
BnJMJ19;e	xy15-HT 12h-2	33.2209
BnJMJ19;e	xy15-HT 12h-3	32.7948
BnJMJ19;e	xy15-HT 24h-1	31.2164
BnJMJ19;e	xy15-HT 24h-2	32.3374
BnJMJ19;e	xy15-HT 24h-3	31.6867
BnJMJ19;e	xy15-HT 36h-1	32.3473
BnJMJ19;e	xy15-HT 36h-2	33.2354
BnJMJ19;e	xy15-HT 36h-3	33.6441
Bnactin	xy15-HT 0h-1	27.1286
Bnactin	xy15-HT 0h-2	26.9069
Bnactin	xy15-HT 0h-3	26.8817
Bnactin	xy15-HT 12h-1	26.0498
Bnactin	xy15-HT 12h-2	26.1327
Bnactin	xy15-HT 12h-3	26.0973
Bnactin	xy15-HT 24h-1	25.9263
Bnactin	xy15-HT 24h-2	26.0546
Bnactin	xy15-HT 24h-3	25.7962
Bnactin	xy15-HT 36h-1	26.9239
Bnactin	xy15-HT 36h-2	26.8932
Bnactin	xy15-HT 36h-3	27.1197
BnJMJ14;a	xy15-HT 0h-1	30.112
BnJMJ14;a	xy15-HT 0h-2	29.9243
BnJMJ14;a	xy15-HT 0h-3	29.8654
BnJMJ14;a	xy15-HT 12h-1	29.2697
BnJMJ14;a	xy15-HT 12h-2	31.9828
BnJMJ14;a	xy15-HT 12h-3	30.3001
BnJMJ14;a	xy15-HT 24h-1	29.2142
BnJMJ14;a	xy15-HT 24h-2	30.1465
BnJMJ14;a	xy15-HT 24h-3	29.1734
BnJMJ14;a	xy15-HT 36h-1	29.9544
BnJMJ14;a	xy15-HT 36h-2	29.5725
BnJMJ14;a	xy15-HT 36h-3	30.5499
BnJMJ16;a	xy15-HT 0h-1	36.2861
BnJMJ16;a	xy15-HT 0h-2	35.972
BnJMJ16;a	xy15-HT 0h-3	36.0602
BnJMJ16;a	xy15-HT 12h-1	32.9766
BnJMJ16;a	xy15-HT 12h-2	33.0312
BnJMJ16;a	xy15-HT 12h-3	32.7394
BnJMJ16;a	xy15-HT 24h-1	34.3613
BnJMJ16;a	xy15-HT 24h-2	34.6091
BnJMJ16;a	xy15-HT 24h-3	34.8318
BnJMJ16;a	xy15-HT 36h-1	32.627
BnJMJ16;a	xy15-HT 36h-2	32.6118
BnJMJ16;a	xy15-HT 36h-3	32.8619
BnJMJ18;d	xy15-HT 0h-1	31.7175
BnJMJ18;d	xy15-HT 0h-2	31.5788
BnJMJ18;d	xy15-HT 0h-3	31.4297
BnJMJ18;d	xy15-HT 12h-1	31.1792
BnJMJ18;d	xy15-HT 12h-2	32.6843
BnJMJ18;d	xy15-HT 12h-3	31.9324
BnJMJ18;d	xy15-HT 24h-1	32.2453
BnJMJ18;d	xy15-HT 24h-2	33.2707
BnJMJ18;d	xy15-HT 24h-3	30.8793
BnJMJ18;d	xy15-HT 36h-1	31.7254
BnJMJ18;d	xy15-HT 36h-2	32.3235
BnJMJ18;d	xy15-HT 36h-3	33.1719
BnJMJ19;a	xy15-HT 0h-1	31.7511
BnJMJ19;a	xy15-HT 0h-2	31.9849
BnJMJ19;a	xy15-HT 0h-3	31.6956
BnJMJ19;a	xy15-HT 12h-1	29.8084
BnJMJ19;a	xy15-HT 12h-2	30.3975
BnJMJ19;a	xy15-HT 12h-3	30.7885
BnJMJ19;a	xy15-HT 24h-1	30.3261
BnJMJ19;a	xy15-HT 24h-2	30.493
BnJMJ19;a	xy15-HT 24h-3	30.6024
BnJMJ19;a	xy15-HT 36h-1	31.2941
BnJMJ19;a	xy15-HT 36h-2	31.1184
BnJMJ19;a	xy15-HT 36h-3	31.419
BnJMJ19;b	xy15-HT 0h-1	30.9021
BnJMJ19;b	xy15-HT 0h-2	31.0983
BnJMJ19;b	xy15-HT 0h-3	31.0311
BnJMJ19;b	xy15-HT 12h-1	30.4045
BnJMJ19;b	xy15-HT 12h-2	30.5108
BnJMJ19;b	xy15-HT 12h-3	30.2023
BnJMJ19;b	xy15-HT 24h-1	30.6456
BnJMJ19;b	xy15-HT 24h-2	31.3396
BnJMJ19;b	xy15-HT 24h-3	30.1592
BnJMJ19;b	xy15-HT 36h-1	30.5065
BnJMJ19;b	xy15-HT 36h-2	30.2538
BnJMJ19;b	xy15-HT 36h-3	30.6181
Bnactin	xy15-HT 0h-1	27.7298
Bnactin	xy15-HT 0h-2	27.5238
Bnactin	xy15-HT 0h-3	27.4966
Bnactin	xy15-HT 12h-1	26.2207
Bnactin	xy15-HT 12h-2	26.2296
Bnactin	xy15-HT 12h-3	26.3287
Bnactin	xy15-HT 24h-1	26.4121
Bnactin	xy15-HT 24h-2	26.5617
Bnactin	xy15-HT 24h-3	26.6324
Bnactin	xy15-HT 36h-1	26.6188
Bnactin	xy15-HT 36h-2	26.4663
Bnactin	xy15-HT 36h-3	26.6946
BnJMJ16;b	xy15-HT 0h-1	29.4404
BnJMJ16;b	xy15-HT 0h-2	29.3106
BnJMJ16;b	xy15-HT 0h-3	29.1479
BnJMJ16;b	xy15-HT 12h-1	27.9079
BnJMJ16;b	xy15-HT 12h-2	27.7132
BnJMJ16;b	xy15-HT 12h-3	27.9022
BnJMJ16;b	xy15-HT 24h-1	28.0831
BnJMJ16;b	xy15-HT 24h-2	27.8633
BnJMJ16;b	xy15-HT 24h-3	27.9195
BnJMJ16;b	xy15-HT 36h-1	28.1366
BnJMJ16;b	xy15-HT 36h-2	28.2175
BnJMJ16;b	xy15-HT 36h-3	28.2381
BnJMJ16;c	xy15-HT 0h-1	29.5061
BnJMJ16;c	xy15-HT 0h-2	29.2969
BnJMJ16;c	xy15-HT 0h-3	29.2063
BnJMJ16;c	xy15-HT 12h-1	29.9045
BnJMJ16;c	xy15-HT 12h-2	28.3088
BnJMJ16;c	xy15-HT 12h-3	29.5371
BnJMJ16;c	xy15-HT 24h-1	29.2921
BnJMJ16;c	xy15-HT 24h-2	29.9006
BnJMJ16;c	xy15-HT 24h-3	28.5004
BnJMJ16;c	xy15-HT 36h-1	29.0816
BnJMJ16;c	xy15-HT 36h-2	28.4553
BnJMJ16;c	xy15-HT 36h-3	30.1306
BnJMJ16;d	xy15-HT 0h-1	31.5349
BnJMJ16;d	xy15-HT 0h-2	31.7327
BnJMJ16;d	xy15-HT 0h-3	31.6858
BnJMJ16;d	xy15-HT 12h-1	30.258
BnJMJ16;d	xy15-HT 12h-2	30.2354
BnJMJ16;d	xy15-HT 12h-3	30.2138
BnJMJ16;d	xy15-HT 24h-1	30.4034
BnJMJ16;d	xy15-HT 24h-2	30.3991
BnJMJ16;d	xy15-HT 24h-3	30.3858
BnJMJ16;d	xy15-HT 36h-1	30.4651
BnJMJ16;d	xy15-HT 36h-2	30.3377
BnJMJ16;d	xy15-HT 36h-3	30.5909
Bnactin	xy15-HT 0h-1	26.8901
Bnactin	xy15-HT 0h-2	26.7172
Bnactin	xy15-HT 0h-3	26.6451
Bnactin	xy15-HT 12h-1	25.4574
Bnactin	xy15-HT 12h-2	25.7003
Bnactin	xy15-HT 12h-3	25.5037
Bnactin	xy15-HT 24h-1	26.2306
Bnactin	xy15-HT 24h-2	25.9695
Bnactin	xy15-HT 24h-3	26.0718
Bnactin	xy15-HT 36h-1	26.4231
Bnactin	xy15-HT 36h-2	26.2185
Bnactin	xy15-HT 36h-3	26.3958
BnJMJ15;a	xy15-HT 0h-1	33.0365
BnJMJ15;a	xy15-HT 0h-2	32.7913
BnJMJ15;a	xy15-HT 0h-3	32.9273
BnJMJ15;a	xy15-HT 12h-1	31.7919
BnJMJ15;a	xy15-HT 12h-2	32.758
BnJMJ15;a	xy15-HT 12h-3	33.4751
BnJMJ15;a	xy15-HT 24h-1	36.1899
BnJMJ15;a	xy15-HT 24h-2	36.4043
BnJMJ15;a	xy15-HT 24h-3	36.1371
BnJMJ15;a	xy15-HT 36h-1	34.6391
BnJMJ15;a	xy15-HT 36h-2	33.566
BnJMJ15;a	xy15-HT 36h-3	32.7819
BnJMJ15;b	xy15-HT 0h-1	36.3385
BnJMJ15;b	xy15-HT 0h-2	36.1706
BnJMJ15;b	xy15-HT 0h-3	36.4814
BnJMJ15;b	xy15-HT 12h-1	34.7567
BnJMJ15;b	xy15-HT 12h-2	33.857
BnJMJ15;b	xy15-HT 12h-3	34.1774
BnJMJ15;b	xy15-HT 24h-1	38.3985
BnJMJ15;b	xy15-HT 24h-2	38.6618
BnJMJ15;b	xy15-HT 24h-3	38.5771
BnJMJ15;b	xy15-HT 36h-1	36.8166
BnJMJ15;b	xy15-HT 36h-2	36.3297
BnJMJ15;b	xy15-HT 36h-3	36.191
BnJMJ15;c	xy15-HT 0h-1	31.626
BnJMJ15;c	xy15-HT 0h-2	31.5114
BnJMJ15;c	xy15-HT 0h-3	31.6322
BnJMJ15;c	xy15-HT 12h-1	30.9909
BnJMJ15;c	xy15-HT 12h-2	35.3991
BnJMJ15;c	xy15-HT 12h-3	32.0165
BnJMJ15;c	xy15-HT 24h-1	35.911
BnJMJ15;c	xy15-HT 24h-2	35.7552
BnJMJ15;c	xy15-HT 24h-3	35.6248
BnJMJ15;c	xy15-HT 36h-1	31.272
BnJMJ15;c	xy15-HT 36h-2	32.2307
BnJMJ15;c	xy15-HT 36h-3	33.1254
BnJMJ17;a	xy15-HT 0h-1	36.4056
BnJMJ17;a	xy15-HT 0h-2	36.1747
BnJMJ17;a	xy15-HT 0h-3	36.2222
BnJMJ17;a	xy15-HT 12h-1	31.8468
BnJMJ17;a	xy15-HT 12h-2	31.6276
BnJMJ17;a	xy15-HT 12h-3	31.6875
BnJMJ17;a	xy15-HT 24h-1	35.2969
BnJMJ17;a	xy15-HT 24h-2	35.3319
BnJMJ17;a	xy15-HT 24h-3	35.5791
BnJMJ17;a	xy15-HT 36h-1	36.2437
BnJMJ17;a	xy15-HT 36h-2	36.453
BnJMJ17;a	xy15-HT 36h-3	36.1501
BnJMJ17;b	xy15-HT 0h-1	35.0076
BnJMJ17;b	xy15-HT 0h-2	35.0254
BnJMJ17;b	xy15-HT 0h-3	34.7652
BnJMJ17;b	xy15-HT 12h-1	29.6144
BnJMJ17;b	xy15-HT 12h-2	29.531
BnJMJ17;b	xy15-HT 12h-3	29.6678
BnJMJ17;b	xy15-HT 24h-1	33.7057
BnJMJ17;b	xy15-HT 24h-2	33.1753
BnJMJ17;b	xy15-HT 24h-3	34.1845
BnJMJ17;b	xy15-HT 36h-1	37.124
BnJMJ17;b	xy15-HT 36h-2	37.0063
BnJMJ17;b	xy15-HT 36h-3	36.8666
BnJMJ18;a	xy15-HT 0h-1	33.9467
BnJMJ18;a	xy15-HT 0h-2	33.8654
BnJMJ18;a	xy15-HT 0h-3	33.7552
BnJMJ18;a	xy15-HT 12h-1	30.0302
BnJMJ18;a	xy15-HT 12h-2	30.0176
BnJMJ18;a	xy15-HT 12h-3	30.2727
BnJMJ18;a	xy15-HT 24h-1	31.8047
BnJMJ18;a	xy15-HT 24h-2	30.6299
BnJMJ18;a	xy15-HT 24h-3	31.2406
BnJMJ18;a	xy15-HT 36h-1	30.1472
BnJMJ18;a	xy15-HT 36h-2	30.2202
BnJMJ18;a	xy15-HT 36h-3	30.3855
BnJMJ18;b	xy15-HT 0h-1	29.0551
BnJMJ18;b	xy15-HT 0h-2	29.1428
BnJMJ18;b	xy15-HT 0h-3	29.2752
BnJMJ18;b	xy15-HT 12h-1	27.4724
BnJMJ18;b	xy15-HT 12h-2	27.7388
BnJMJ18;b	xy15-HT 12h-3	27.4854
BnJMJ18;b	xy15-HT 24h-1	28.2695
BnJMJ18;b	xy15-HT 24h-2	28.3858
BnJMJ18;b	xy15-HT 24h-3	28.5075
BnJMJ18;b	xy15-HT 36h-1	28.8555
BnJMJ18;b	xy15-HT 36h-2	28.7616
BnJMJ18;b	xy15-HT 36h-3	29.0698
Bnactin	xy15-HT 0h-1	27.6071
Bnactin	xy15-HT 0h-2	27.6121
Bnactin	xy15-HT 0h-3	27.3997
Bnactin	xy15-HT 12h-1	26.1969
Bnactin	xy15-HT 12h-2	26.1444
Bnactin	xy15-HT 12h-3	26.1295
Bnactin	xy15-HT 24h-1	26.8839
Bnactin	xy15-HT 24h-2	26.8545
Bnactin	xy15-HT 24h-3	26.9172
Bnactin	xy15-HT 36h-1	26.7105
Bnactin	xy15-HT 36h-2	26.708
Bnactin	xy15-HT 36h-3	26.4159
BnJMJ14;b	xy15-HT 0h-1	30.0069
BnJMJ14;b	xy15-HT 0h-2	29.8641
BnJMJ14;b	xy15-HT 0h-3	29.6637
BnJMJ14;b	xy15-HT 12h-1	28.5621
BnJMJ14;b	xy15-HT 12h-2	28.6335
BnJMJ14;b	xy15-HT 12h-3	28.383
BnJMJ14;b	xy15-HT 24h-1	29.2708
BnJMJ14;b	xy15-HT 24h-2	29.8668
BnJMJ14;b	xy15-HT 24h-3	29.5928
BnJMJ14;b	xy15-HT 36h-1	29.1289
BnJMJ14;b	xy15-HT 36h-2	29.3856
BnJMJ14;b	xy15-HT 36h-3	29.6068
BnJMJ18;c	xy15-HT 0h-1	31.3702
BnJMJ18;c	xy15-HT 0h-2	31.1656
BnJMJ18;c	xy15-HT 0h-3	31.407
BnJMJ18;c	xy15-HT 12h-1	30.0516
BnJMJ18;c	xy15-HT 12h-2	30.0732
BnJMJ18;c	xy15-HT 12h-3	30.0116
BnJMJ18;c	xy15-HT 24h-1	30.3114
BnJMJ18;c	xy15-HT 24h-2	30.1137
BnJMJ18;c	xy15-HT 24h-3	29.8704
BnJMJ18;c	xy15-HT 36h-1	30.0588
BnJMJ18;c	xy15-HT 36h-2	29.7575
BnJMJ18;c	xy15-HT 36h-3	30.4906
BnJMJ19;c	xy15-HT 0h-1	29.6755
BnJMJ19;c	xy15-HT 0h-2	29.7195
BnJMJ19;c	xy15-HT 0h-3	29.7654
BnJMJ19;c	xy15-HT 12h-1	31.8595
BnJMJ19;c	xy15-HT 12h-2	28.8811
BnJMJ19;c	xy15-HT 12h-3	29.837
BnJMJ19;c	xy15-HT 24h-1	33.8849
BnJMJ19;c	xy15-HT 24h-2	30.8048
BnJMJ19;c	xy15-HT 24h-3	29.9662
BnJMJ19;c	xy15-HT 36h-1	29.4912
BnJMJ19;c	xy15-HT 36h-2	30.2834
BnJMJ19;c	xy15-HT 36h-3	32.0936

## Sheet: Salt stress 
Target	Sample	Cq Mean
Bnactin	xy15-Salt 0mm-1	29.5465
Bnactin	xy15-Salt 0mm-2	29.29
Bnactin	xy15-Salt 0mm-3	29.2961
Bnactin	xy15-Salt 100mm-1	27.653
Bnactin	xy15-Salt 100mm-2	27.8002
Bnactin	xy15-Salt 100mm-3	27.6675
Bnactin	xy15-Salt 200mm-1	25.184
Bnactin	xy15-Salt 200mm-2	25.3628
Bnactin	xy15-Salt 200mm-3	25.2749
Bnactin	xy15-Salt 300mm-1	27.4529
Bnactin	xy15-Salt 300mm-2	27.1787
Bnactin	xy15-Salt 300mm-3	27.405
BnJMJ14;a	xy15-Salt 0mm-1	30.5693
BnJMJ14;a	xy15-Salt 0mm-2	30.5439
BnJMJ14;a	xy15-Salt 0mm-3	30.6835
BnJMJ14;a	xy15-Salt 100mm-1	28.0109
BnJMJ14;a	xy15-Salt 100mm-2	27.8665
BnJMJ14;a	xy15-Salt 100mm-3	27.8498
BnJMJ14;a	xy15-Salt 200mm-1	25.1949
BnJMJ14;a	xy15-Salt 200mm-2	25.0427
BnJMJ14;a	xy15-Salt 200mm-3	24.932
BnJMJ14;a	xy15-Salt 300mm-1	26.7086
BnJMJ14;a	xy15-Salt 300mm-2	27.5188
BnJMJ14;a	xy15-Salt 300mm-3	28.8084
BnJMJ14;b	xy15-Salt 0mm-1	32.372
BnJMJ14;b	xy15-Salt 0mm-2	32.2773
BnJMJ14;b	xy15-Salt 0mm-3	32.2562
BnJMJ14;b	xy15-Salt 100mm-1	29.0777
BnJMJ14;b	xy15-Salt 100mm-2	29.5191
BnJMJ14;b	xy15-Salt 100mm-3	30.1015
BnJMJ14;b	xy15-Salt 200mm-1	25.227
BnJMJ14;b	xy15-Salt 200mm-2	25.1046
BnJMJ14;b	xy15-Salt 200mm-3	24.9807
BnJMJ14;b	xy15-Salt 300mm-1	30.0852
BnJMJ14;b	xy15-Salt 300mm-2	30.1597
BnJMJ14;b	xy15-Salt 300mm-3	30.0477
BnJMJ15;c	xy15-Salt 0mm-1	36.418
BnJMJ15;c	xy15-Salt 0mm-2	36.6606
BnJMJ15;c	xy15-Salt 0mm-3	36.465
BnJMJ15;c	xy15-Salt 100mm-1	34.1004
BnJMJ15;c	xy15-Salt 100mm-2	35.4993
BnJMJ15;c	xy15-Salt 100mm-3	34.7134
BnJMJ15;c	xy15-Salt 200mm-1	27.8332
BnJMJ15;c	xy15-Salt 200mm-2	28.3174
BnJMJ15;c	xy15-Salt 200mm-3	28.2686
BnJMJ15;c	xy15-Salt 300mm-1	34.5397
BnJMJ15;c	xy15-Salt 300mm-2	34.2638
BnJMJ15;c	xy15-Salt 300mm-3	34.3843
BnJMJ16;b	xy15-Salt 0mm-1	29.8417
BnJMJ16;b	xy15-Salt 0mm-2	28.6112
BnJMJ16;b	xy15-Salt 0mm-3	29.2062
BnJMJ16;b	xy15-Salt 100mm-1	28.2256
BnJMJ16;b	xy15-Salt 100mm-2	28.1445
BnJMJ16;b	xy15-Salt 100mm-3	28.1266
BnJMJ16;b	xy15-Salt 200mm-1	25.5948
BnJMJ16;b	xy15-Salt 200mm-2	25.7477
BnJMJ16;b	xy15-Salt 200mm-3	25.7942
BnJMJ16;b	xy15-Salt 300mm-1	28.372
BnJMJ16;b	xy15-Salt 300mm-2	27.4347
BnJMJ16;b	xy15-Salt 300mm-3	29.6004
Bnactin	xy15-Salt 0mm-1	31.2503
Bnactin	xy15-Salt 0mm-2	31.0947
Bnactin	xy15-Salt 0mm-3	31.0165
Bnactin	xy15-Salt 100mm-1	28.3012
Bnactin	xy15-Salt 100mm-2	28.4981
Bnactin	xy15-Salt 100mm-3	28.3426
Bnactin	xy15-Salt 200mm-1	27.5132
Bnactin	xy15-Salt 200mm-2	27.4902
Bnactin	xy15-Salt 200mm-3	27.2653
Bnactin	xy15-Salt 300mm-1	28.2515
Bnactin	xy15-Salt 300mm-2	28.1009
Bnactin	xy15-Salt 300mm-3	28.3031
BnJMJ16;c	xy15-Salt 0mm-1	32.5401
BnJMJ16;c	xy15-Salt 0mm-2	31.3331
BnJMJ16;c	xy15-Salt 0mm-3	31.9439
BnJMJ16;c	xy15-Salt 100mm-1	29.2674
BnJMJ16;c	xy15-Salt 100mm-2	29.4659
BnJMJ16;c	xy15-Salt 100mm-3	29.4049
BnJMJ16;c	xy15-Salt 200mm-1	28.8722
BnJMJ16;c	xy15-Salt 200mm-2	29.1096
BnJMJ16;c	xy15-Salt 200mm-3	29.0061
BnJMJ16;c	xy15-Salt 300mm-1	29.1081
BnJMJ16;c	xy15-Salt 300mm-2	28.9034
BnJMJ16;c	xy15-Salt 300mm-3	29.0432
BnJMJ16;d	xy15-Salt 0mm-1	33.3826
BnJMJ16;d	xy15-Salt 0mm-2	32.7728
BnJMJ16;d	xy15-Salt 0mm-3	32.1182
BnJMJ16;d	xy15-Salt 100mm-1	30.5622
BnJMJ16;d	xy15-Salt 100mm-2	30.6966
BnJMJ16;d	xy15-Salt 100mm-3	30.4377
BnJMJ16;d	xy15-Salt 200mm-1	29.3173
BnJMJ16;d	xy15-Salt 200mm-2	29.5952
BnJMJ16;d	xy15-Salt 200mm-3	29.4103
BnJMJ16;d	xy15-Salt 300mm-1	30.6289
BnJMJ16;d	xy15-Salt 300mm-2	30.3313
BnJMJ16;d	xy15-Salt 300mm-3	30.8097
BnJMJ17;a	xy15-Salt 0mm-1	33.441
BnJMJ17;a	xy15-Salt 0mm-2	33.1542
BnJMJ17;a	xy15-Salt 0mm-3	32.6643
BnJMJ17;a	xy15-Salt 100mm-1	29.8917
BnJMJ17;a	xy15-Salt 100mm-2	29.6251
BnJMJ17;a	xy15-Salt 100mm-3	29.7085
BnJMJ17;a	xy15-Salt 200mm-1	29.013
BnJMJ17;a	xy15-Salt 200mm-2	29.0261
BnJMJ17;a	xy15-Salt 200mm-3	28.8092
BnJMJ17;a	xy15-Salt 300mm-1	30.0073
BnJMJ17;a	xy15-Salt 300mm-2	30.1786
BnJMJ17;a	xy15-Salt 300mm-3	30.0847
BnJMJ17;c	xy15-Salt 0mm-1	33.4159
BnJMJ17;c	xy15-Salt 0mm-2	33.6101
BnJMJ17;c	xy15-Salt 0mm-3	33.6922
BnJMJ17;c	xy15-Salt 100mm-1	29.6761
BnJMJ17;c	xy15-Salt 100mm-2	29.7711
BnJMJ17;c	xy15-Salt 100mm-3	29.7014
BnJMJ17;c	xy15-Salt 200mm-1	28.5089
BnJMJ17;c	xy15-Salt 200mm-2	29.5583
BnJMJ17;c	xy15-Salt 200mm-3	29.0141
BnJMJ17;c	xy15-Salt 300mm-1	29.8662
BnJMJ17;c	xy15-Salt 300mm-2	29.7438
BnJMJ17;c	xy15-Salt 300mm-3	29.7943
BnJMJ18;b	xy15-Salt 0mm-1	32.2893
BnJMJ18;b	xy15-Salt 0mm-2	32.0026
BnJMJ18;b	xy15-Salt 0mm-3	33.2766
BnJMJ18;b	xy15-Salt 100mm-1	29.1719
BnJMJ18;b	xy15-Salt 100mm-2	29.4144
BnJMJ18;b	xy15-Salt 100mm-3	29.4519
BnJMJ18;b	xy15-Salt 200mm-1	28.6063
BnJMJ18;b	xy15-Salt 200mm-2	28.5888
BnJMJ18;b	xy15-Salt 200mm-3	28.4245
BnJMJ18;b	xy15-Salt 300mm-1	29.2547
BnJMJ18;b	xy15-Salt 300mm-2	29.3271
BnJMJ18;b	xy15-Salt 300mm-3	29.4319
Bnactin	xy15-Salt 0mm-1	29.3222
Bnactin	xy15-Salt 0mm-2	29.2386
Bnactin	xy15-Salt 0mm-3	29.0861
Bnactin	xy15-Salt 100mm-1	28.0762
Bnactin	xy15-Salt 100mm-2	28.1458
Bnactin	xy15-Salt 100mm-3	28.1062
Bnactin	xy15-Salt 200mm-1	26.9648
Bnactin	xy15-Salt 200mm-2	27.1406
Bnactin	xy15-Salt 200mm-3	27.0096
Bnactin	xy15-Salt 300mm-1	27.6977
Bnactin	xy15-Salt 300mm-2	27.5922
Bnactin	xy15-Salt 300mm-3	27.857
BnJMJ18;c	xy15-Salt 0mm-1	32.0483
BnJMJ18;c	xy15-Salt 0mm-2	31.8371
BnJMJ18;c	xy15-Salt 0mm-3	32.0931
BnJMJ18;c	xy15-Salt 100mm-1	30.8021
BnJMJ18;c	xy15-Salt 100mm-2	30.7772
BnJMJ18;c	xy15-Salt 100mm-3	31.0352
BnJMJ18;c	xy15-Salt 200mm-1	29.7298
BnJMJ18;c	xy15-Salt 200mm-2	29.8513
BnJMJ18;c	xy15-Salt 200mm-3	29.8829
BnJMJ18;c	xy15-Salt 300mm-1	30.3575
BnJMJ18;c	xy15-Salt 300mm-2	31.1328
BnJMJ18;c	xy15-Salt 300mm-3	31.7316
BnJMJ18;d	xy15-Salt 0mm-1	34.2679
BnJMJ18;d	xy15-Salt 0mm-2	35.1577
BnJMJ18;d	xy15-Salt 0mm-3	34.7976
BnJMJ18;d	xy15-Salt 100mm-1	31.4722
BnJMJ18;d	xy15-Salt 100mm-2	31.6816
BnJMJ18;d	xy15-Salt 100mm-3	31.5182
BnJMJ18;d	xy15-Salt 200mm-1	31.2733
BnJMJ18;d	xy15-Salt 200mm-2	31.497
BnJMJ18;d	xy15-Salt 200mm-3	31.3615
BnJMJ18;d	xy15-Salt 300mm-1	32.912
BnJMJ18;d	xy15-Salt 300mm-2	32.6558
BnJMJ18;d	xy15-Salt 300mm-3	32.8872
BnJMJ19;a	xy15-Salt 0mm-1	32.7505
BnJMJ19;a	xy15-Salt 0mm-2	32.2014
BnJMJ19;a	xy15-Salt 0mm-3	32.0586
BnJMJ19;a	xy15-Salt 100mm-1	30.7689
BnJMJ19;a	xy15-Salt 100mm-2	30.9065
BnJMJ19;a	xy15-Salt 100mm-3	30.8166
BnJMJ19;a	xy15-Salt 200mm-1	30.4037
BnJMJ19;a	xy15-Salt 200mm-2	30.6828
BnJMJ19;a	xy15-Salt 200mm-3	30.4722
BnJMJ19;a	xy15-Salt 300mm-1	30.7786
BnJMJ19;a	xy15-Salt 300mm-2	30.678
BnJMJ19;a	xy15-Salt 300mm-3	30.9224
BnJMJ19;b	xy15-Salt 0mm-1	30.7579
BnJMJ19;b	xy15-Salt 0mm-2	30.5463
BnJMJ19;b	xy15-Salt 0mm-3	30.5478
BnJMJ19;b	xy15-Salt 100mm-1	29.6067
BnJMJ19;b	xy15-Salt 100mm-2	29.8511
BnJMJ19;b	xy15-Salt 100mm-3	29.5929
BnJMJ19;b	xy15-Salt 200mm-1	30.4449
BnJMJ19;b	xy15-Salt 200mm-2	30.2787
BnJMJ19;b	xy15-Salt 200mm-3	30.271
BnJMJ19;b	xy15-Salt 300mm-1	30.3531
BnJMJ19;b	xy15-Salt 300mm-2	30.3363
BnJMJ19;b	xy15-Salt 300mm-3	30.5212
Bnactin	xy15-Salt 0mm-1	29.3122
Bnactin	xy15-Salt 0mm-2	29.185
Bnactin	xy15-Salt 0mm-3	29.0381
Bnactin	xy15-Salt 100mm-1	28.3099
Bnactin	xy15-Salt 100mm-2	28.3407
Bnactin	xy15-Salt 100mm-3	28.1269
Bnactin	xy15-Salt 200mm-1	28.0522
Bnactin	xy15-Salt 200mm-2	28.0087
Bnactin	xy15-Salt 200mm-3	28.0291
Bnactin	xy15-Salt 300mm-1	27.01
Bnactin	xy15-Salt 300mm-2	26.7752
Bnactin	xy15-Salt 300mm-3	27.0564
BnJMJ15;a	xy15-Salt 0mm-1	38.7363
BnJMJ15;a	xy15-Salt 0mm-2	38.4522
BnJMJ15;a	xy15-Salt 0mm-3	38.5055
BnJMJ15;a	xy15-Salt 100mm-1	34.679
BnJMJ15;a	xy15-Salt 100mm-2	34.8366
BnJMJ15;a	xy15-Salt 100mm-3	34.9814
BnJMJ15;a	xy15-Salt 200mm-1	38.3452
BnJMJ15;a	xy15-Salt 200mm-2	37.5524
BnJMJ15;a	xy15-Salt 200mm-3	39.632
BnJMJ15;a	xy15-Salt 300mm-1	39.6288
BnJMJ15;a	xy15-Salt 300mm-2	39.4016
BnJMJ15;a	xy15-Salt 300mm-3	39.6399
BnJMJ15;b	xy15-Salt 0mm-1	36.4983
BnJMJ15;b	xy15-Salt 0mm-2	35.8707
BnJMJ15;b	xy15-Salt 0mm-3	35.4704
BnJMJ15;b	xy15-Salt 100mm-1	34.3423
BnJMJ15;b	xy15-Salt 100mm-2	34.4008
BnJMJ15;b	xy15-Salt 100mm-3	34.1303
BnJMJ15;b	xy15-Salt 200mm-1	35.2212
BnJMJ15;b	xy15-Salt 200mm-2	35.2401
BnJMJ15;b	xy15-Salt 200mm-3	35.9651
BnJMJ15;b	xy15-Salt 300mm-1	36.1486
BnJMJ15;b	xy15-Salt 300mm-2	36.3968
BnJMJ15;b	xy15-Salt 300mm-3	36.2728
BnJMJ16;a	xy15-Salt 0mm-1	36.0512
BnJMJ16;a	xy15-Salt 0mm-2	35.333
BnJMJ16;a	xy15-Salt 0mm-3	35.687
BnJMJ16;a	xy15-Salt 100mm-1	32.8975
BnJMJ16;a	xy15-Salt 100mm-2	33.0824
BnJMJ16;a	xy15-Salt 100mm-3	33.0368
BnJMJ16;a	xy15-Salt 200mm-1	34.2328
BnJMJ16;a	xy15-Salt 200mm-2	34.0603
BnJMJ16;a	xy15-Salt 200mm-3	34.2883
BnJMJ16;a	xy15-Salt 300mm-1	35.2184
BnJMJ16;a	xy15-Salt 300mm-2	33.2109
BnJMJ16;a	xy15-Salt 300mm-3	34.2081
BnJMJ17;b	xy15-Salt 0mm-1	33.7793
BnJMJ17;b	xy15-Salt 0mm-2	33.4569
BnJMJ17;b	xy15-Salt 0mm-3	32.8184
BnJMJ17;b	xy15-Salt 100mm-1	31.0037
BnJMJ17;b	xy15-Salt 100mm-2	31.1974
BnJMJ17;b	xy15-Salt 100mm-3	31.033
BnJMJ17;b	xy15-Salt 200mm-1	33.1127
BnJMJ17;b	xy15-Salt 200mm-2	34.9437
BnJMJ17;b	xy15-Salt 200mm-3	32.2927
BnJMJ17;b	xy15-Salt 300mm-1	32.1724
BnJMJ17;b	xy15-Salt 300mm-2	32.4239
BnJMJ17;b	xy15-Salt 300mm-3	32.3115
BnJMJ18;a	xy15-Salt 0mm-1	36.7664
BnJMJ18;a	xy15-Salt 0mm-2	36.9499
BnJMJ18;a	xy15-Salt 0mm-3	36.8519
BnJMJ18;a	xy15-Salt 100mm-1	33.3685
BnJMJ18;a	xy15-Salt 100mm-2	33.2403
BnJMJ18;a	xy15-Salt 100mm-3	33.1734
BnJMJ18;a	xy15-Salt 200mm-1	34.9703
BnJMJ18;a	xy15-Salt 200mm-2	34.454
BnJMJ18;a	xy15-Salt 200mm-3	34.1019
BnJMJ18;a	xy15-Salt 300mm-1	32.305
BnJMJ18;a	xy15-Salt 300mm-2	32.1083
BnJMJ18;a	xy15-Salt 300mm-3	32.347
BnJMJ19;c	xy15-Salt 0mm-1	31.4642
BnJMJ19;c	xy15-Salt 0mm-2	30.705
BnJMJ19;c	xy15-Salt 0mm-3	29.5095
BnJMJ19;c	xy15-Salt 100mm-1	29.5038
BnJMJ19;c	xy15-Salt 100mm-2	29.664
BnJMJ19;c	xy15-Salt 100mm-3	29.4643
BnJMJ19;c	xy15-Salt 200mm-1	29.3287
BnJMJ19;c	xy15-Salt 200mm-2	29.29
BnJMJ19;c	xy15-Salt 200mm-3	29.4466
BnJMJ19;c	xy15-Salt 300mm-1	28.6198
BnJMJ19;c	xy15-Salt 300mm-2	28.6524
BnJMJ19;c	xy15-Salt 300mm-3	28.8403
BnJMJ19;e	xy15-Salt 0mm-1	33.3979
BnJMJ19;e	xy15-Salt 0mm-2	32.7649
BnJMJ19;e	xy15-Salt 0mm-3	31.6778
BnJMJ19;e	xy15-Salt 100mm-1	31.556
BnJMJ19;e	xy15-Salt 100mm-2	31.5833
BnJMJ19;e	xy15-Salt 100mm-3	31.4411
BnJMJ19;e	xy15-Salt 200mm-1	31.4342
BnJMJ19;e	xy15-Salt 200mm-2	31.5323
BnJMJ19;e	xy15-Salt 200mm-3	31.7374
BnJMJ19;e	xy15-Salt 300mm-1	31.1847
BnJMJ19;e	xy15-Salt 300mm-2	31.4531
BnJMJ19;e	xy15-Salt 300mm-3	31.3879
